# Supplementary material for: The first bis-Rh(i) metal complex of N-confused porphyrin
Source: Royal Society of Chemistry journal article supplement (doi:10.1039/b104004a), 2001-01-01

# Supplementary Information

for

The First *Bis*-Rh(I) Metal Complex of N-Confused Porphyrin

Alagar Srinivasan, Hiroyuki Furuta, and Atsuhiro Osuka

Synthetic procedures of *bis*-Rh(I)NCTPP (**2**) and *bis*-Rh(I)TPP (**4**) 1 page

X-ray information for *bis*-Rh(I)NCTPP (**2**) 23 pages

X-ray information for *bis*-Rh(I)TPP (**4**) 17 pages

---------------------------------------------------------------------------------------------------------- **Synthetic procedures of *bis*-Rh(I)NCTPP (2) and *bis*-Rh(I)TPP (4)**

***Bis*-Rh(I)NCTPP (2):** NCP (0.050 g, 8.14 x 10-5 mol) was dissolved in CH2Cl2 (50 ml). Anhydrous sodium acetate (0.067 g, 8.14 x 10-4 mol) and [Rh(CO)2Cl]2 (0.032 g, 8.14 x 10-5 mol) were added to the solution and the mixture was stirred under reflux for 2h. The solvent was evaporated and residue was chromatographed by using a silica gel column with CH2Cl2/CH3OH (99:1). Removal of the solvent gave a blue green solid which was recrystallized from CH2Cl2 / hexane (yield 0.042 g, 53%). 1H NMR (CDCl3, 500 MHz): ** -3.83 (s, 1H, inner-CH), 0.11 (brs, 1H, inner-NH), 8.90 (s, 1H, outer-CH), 7.72-7.75 (m, 6H), 7.89-7.91 (m, 4H), 7.95-8.08 (m, 4H), 8.10-8.20 (m, 4H), 8.27 (d, *J* = 5.0 Hz, 1H), 8.33 (d, *J* = 4.0 Hz, 2H), 8.48 (d, *J* = 5.0 Hz, 1H), 8.53 (d, *J* = 3 Hz, 1H), 8.59 (d, *J* = 2.0 Hz, 1H), 8.78 (d, *J* = 7.0 Hz, 1H), 8.97 (dd, *J* = 2.0, 7.0 Hz, 1H); FAB Mass (m/z): 967.5 [M]+; UV/Vis (CH2Cl2): max [nm] (** x 10-5): 770 (0.143), 646 (0.097), 589 (0.053), 548 (0.045), 488 (1.08), 433 (0.474), 358 (0.534).

***Bis*-Rh(I)TPP (4):** TPP (0.050 g, 8.14 x 10-5 mol) was dissolved in CH2Cl2  (50 ml). Anhydrous sodium acetate (0.067 g, 8.14 x 10-4 mol) and [Rh(CO)2Cl]2 (0.032 g, 8.14 x 10-5 mol) were added to the solution and the mixture was stirred under reflux for 2h. The solvent was evaporated under reduced pressure and the residue was chromatographed by using a silica gel column with hexane/CH2Cl2 (30:70). Removal of the solvent gave a purple solid which was recrystallized from CH2Cl2 / hexane (yield 0.027 g, 36%). 1H NMR (CDCl3, 500 MHz): ** 8.73 (d, *J* = 4.5 Hz, 4H), 8.57 (d, *J* = 4.5 Hz, 4H), 8.28-8.34 (m, 8H), 7.79-7.82 (m, 12H); FAB Mass (m/z): 930.6 [M]+; UV/Vis (CH2Cl2): max [nm] (** x 10-5): 704 (0.079), 509 (sh, 0.198), 460 (0.803), 371 (0.713).

Supplementary X-ray information for *bis*-Rh(I)NCTPP (**2**)

X-ray Experimental.

Crystallographic Data for *bis*-Rh(I)NCTPP (**2**).

Supplementary Table 1. Atomic Coordinates and Biso/Beq for *bis*-Rh(I)NCTPP (**2**).

Supplementary Table 2. Anistropic displacement parameter for *bis*-Rh(I)NCTPP (**2**).

Supplementary Table 3. Bond lengths (Å) for *bis*-Rh(I)NCTPP (**2**).

Supplementary Table 4. Bond Angles (°) for *bis*-Rh(I)NCTPP (**2**).

Supplementary Table 5. Torsion Angles (°) for *bis*-Rh(I)NCTPP (**2**).

Supplementary Table 6. Least Squares Planes.

Supplementary Figure 1. View of C48H29N4Rh2O4Cl, *bis*-Rh(I)NCTPP (**2**), showing the atom labeling scheme. Thermal ellipsoids are scaled to the 50% probability level. Hydrogen atoms shown are drawn to an arbitrary scale.

Supplementary Figure 2. Unit cell packing diagram for *bis*-Rh(I)NCTPP (**2**).

*Experimental*

Data Collection

A green prism crystal of C48.50H31N4Rh2O4.50Cl2 having approximate dimensions of 0.90 x 0.20 x 0.15 mm was mounted on a glass fiber. All measurements were made on a Rigaku RAXIS imaging plate area detector with graphite monochromated Mo-K radiation.

Indexing was performed from 2 stills which were exposed for 0.8 minutes. The crystal-to-detector distance was 110.00 mm. The detector swing angle was 5.00o. Readout was performed in the 0.100 mm pixel mode.

Cell constants and an orientation matrix for data collection corresponded to a C-centered monoclinic cell with dimensions:

a = 18.0381(3) Å

b = 31.4290(5) Å  = 111.3050(6)o

c = 17.1686(3) Å

V = 9068.0(2) Å3

For Z = 8 and F.W. = 1018.52, the calculated density is 1.49 g/cm3. Based on the systematic absences of:

hkl: h+k ± 2n

h0l: l ± 2n

packing considerations, a statistical analysis of intensity distribution, and the successful solution and refinement of the structure, the space group was determined to be:

C2/c (#15)

The data were collected at a temperature of 23 + 1oC to a maximum 2 value of 55.0o. A total of 74 (222.00o) oscillation images were collected, each being exposed for 15.0 minutes. The crystal-to-detector distance was 110.00 mm. The detector swing angle was 3.00o. Readout was performed in the 0.100 mm pixel mode.

Data Reduction

A total of 10611 reflections was collected.

The linear absorption coefficient, , for Mo-K radiation is 8.3 cm-1. A symmetry-related absorption correction using the program ABSCOR was applied which resulted in transmission factors ranging from 0.79 to 1.10. The data were corrected for Lorentz and polarization effects. A correction for secondary extinction was applied (coefficient = 6.45900e-008).

Structure Solution and Refinement

The structure was solved by direct methods1 and expanded using Fourier techniques2. The non-hydrogen atoms were refined anisotropically. Hydrogen atoms were included but not refined. The final cycle of full-matrix least-squares refinement3 on F was based on 7278 observed reflections (I > 3.00(I)) and 536 variable parameters and converged (largest parameter shift was 0.00 times its esd) with unweighted and weighted agreement factors of:

R =  ||Fo| - |Fc|| /  |Fo| = 0.039

Rw = [  w (|Fo| - |Fc|)2 /  w Fo2]1/2 = 0.072

The standard deviation of an observation of unit weight4 was 0.49. Unit weights were used. Plots of  w (|Fo| - |Fc|)2 versus |Fo|, reflection order in data collection, sin / and various classes of indices showed no unusual trends. The maximum and minimum peaks on the final difference Fourier map corresponded to 2.33 and -0.40 e‑/Å3, respectively.

Neutral atom scattering factors were taken from Cromer and Waber5. Anomalous dispersion effects were included in Fcalc6; the values for f' and f" were those of Creagh and McAuley7. The values for the mass attenuation coefficients are those of Creagh and Hubbell8. All calculations were performed using the teXsan9 crystallographic software package of Molecular Structure Corporation.

*References*

(1) SIR92: Altomare, A., Cascarano, M., Giacovazzo, C., Guagliardi, A. (1994). J. Appl. Cryst., 26, 343.

(2) DIRDIF94: Beurskens, P.T., Admiraal, G., Beurskens, G., Bosman, W.P., de Gelder, R., Israel, R. and Smits, J.M.M.(1994). The DIRDIF-94 program system, Technical Report of the Crystallography Laboratory, University of Nijmegen, The Netherlands.

(3) Least Squares function minimized:

*w*(|Fo|-|Fc|)2

(4) Standard deviation of an observation of unit weight:

[*w*(|Fo|-|Fc|)2/(No-Nv)]1/2

where: No = number of observations

Nv = number of variables

(5) Cromer, D. T. & Waber, J. T.; "International Tables for X-ray Crystallography", Vol. IV, The Kynoch Press, Birmingham, England, Table 2.2 A (1974).

(6) Ibers, J. A. & Hamilton, W. C.; Acta Crystallogr., 17, 781 (1964).

(7) Creagh, D. C. & McAuley, W.J .; "International Tables for Crystallography", Vol C, (A.J.C. Wilson, ed.), Kluwer Academic Publishers, Boston, Table 4.2.6.8, pages 219-222 (1992).

(8) Creagh, D. C. & Hubbell, J.H..; "International Tables for Crystallography", Vol C, (A.J.C. Wilson, ed.), Kluwer Academic Publishers, Boston, Table 4.2.4.3, pages 200-206 (1992).

(9) teXsan for Windows version 1.06: Crystal Structure Analysis Package, Molecular Structure Corporation (1997-9).

*EXPERIMENTAL DETAILS*

A. Crystal Data

Empirical Formula C48.50H31N4Rh2O4.5Cl2

Formula Weight 1018.52

Crystal Color, Habit green, prism

Crystal Dimensions 0.90 X 0.20 X 0.15 mm

Crystal System monoclinic

Lattice Type C-centered

Indexing Images 2 stills @ 0.8 minutes

Detector Position 110.00 mm

Detector Swing Angle 5.00o

Pixel Size 0.100 mm

Lattice Parameters a = 18.0381(3) Å

b =  31.4290(5) Å

c =  17.1686(3) Å

 = 111.3050(6) o

V = 9068.0(2) Å3

Space Group C2/c (#15)

Z value 8

Dcalc 1.492 g/cm3

F000 4080.00

(MoK) 8.93 cm-1

B. Intensity Measurements

Diffractometer RAXIS-RAPID

Radiation MoK ( = 0.71069 Å)

graphite monochromated

Detector Aperture 200 mm x 200 mm

Data Images 74 exposures @ 15.0 minutes

Oscillation Range 222.0o

Detector Position 110.00 mm

Detector Swing Angle 3.00o

Pixel Size 0.100 mm

2max 55.0o

No. of Reflections Measured Total: 10611

Unique: 10420 (Rint = 0.034)

Corrections Lorentz-polarization

C. Structure Solution and Refinement

Structure Solution Direct Methods (SIR92)

Refinement Full-matrix least-squares on F

Function Minimized  w (|Fo| - |Fc|)2

Least Squares Weights 1

p-factor 0.0100

Anomalous Dispersion All non-hydrogen atoms

No. Observations (I>3.00(I)) 7278

No. Variables 536

Reflection/Parameter Ratio 13.58

Residuals: R; Rw 0.039 ; 0.072

Goodness of Fit Indicator 0.49

Max Shift/Error in Final Cycle 0.00

Maximum peak in Final Diff. Map 2.33 e‑/Å3

Minimum peak in Final Diff. Map -0.40 e‑/Å3

Supplementary Table 1. Atomic coordinates and Biso/Beq and occupancy

atom    x    y    z  Beq  occ

Rh(1) -0.19165(6)  0.17807(3) -0.65456(6)  3.83(2)

Rh(2) -0.28859(5) -0.01434(3) -0.72296(5)  3.07(2)

Cl(1) -0.0815(2)  0.1928(1) -0.5326(3)  6.15(9)

Cl(2)  0.6198  0.2511 -0.0578  46.6(2)   1/2

Cl(3)  0.7816  0.2262  0.0771  49.7(2)   1/2

O(1) -0.1965(8)  0.2711(3) -0.6875(9)  8.3(4)

O(2) -0.3289(8)  0.1633(4) -0.8118(8)  8.7(4)

O(3) -0.2405(7) -0.0453(4) -0.8627(6)  6.9(3)

O(4) -0.3526(7)  0.0647(4) -0.8208(7)  7.5(3)

O(6)  0.5000  0.2425  0.7500  35.0(2)   1/2

N(1) -0.1677(5)  0.1131(3) -0.6279(6)  3.3(2)

N(2) -0.0981(5) -0.0368(3) -0.6416(6)  3.1(2)

N(3) -0.2616(5) -0.0727(3) -0.6595(6)  3.2(2)

N(4) -0.3221(5)  0.0056(3) -0.6252(6)  3.1(2)

C(1) -0.2067(6)  0.0783(3) -0.6051(6)  3.0(2)

C(2) -0.1569(6)  0.0426(3) -0.5910(6)  2.9(2)

C(3) -0.0997(6)  0.0985(3) -0.6283(7)  3.4(2)

C(4) -0.0879(6)  0.0540(3) -0.6063(6)  3.0(2)

C(5) -0.0222(6)  0.0295(3) -0.6089(6)  3.0(2)

C(6) -0.0277(6) -0.0144(3) -0.6218(6)  3.1(2)

C(7)  0.0303(6) -0.0450(4) -0.6239(7)  3.7(2)

C(8) -0.0063(7) -0.0832(4) -0.6480(7)  3.8(3)

C(9) -0.0889(6) -0.0783(3) -0.6601(7)  3.2(2)

C(10) -0.1472(6) -0.1099(3) -0.6808(7)  3.3(2)

C(11) -0.2229(6) -0.1079(3) -0.6751(7)  3.3(2)

C(12) -0.2681(7) -0.1458(3) -0.6740(8)  3.9(3)

C(13) -0.3307(7) -0.1340(4) -0.6535(8)  3.9(3)

C(14) -0.3271(6) -0.0883(3) -0.6426(7)  3.3(2)

C(15) -0.3784(6) -0.0644(3) -0.6162(7)  3.2(2)

C(16) -0.3716(6) -0.0204(3) -0.6018(7)  3.4(2)

C(17) -0.4110(7)  0.0044(4) -0.5582(8)  4.2(3)

C(18) -0.3860(7)  0.0452(4) -0.5562(8)  4.1(3)

C(19) -0.3288(6)  0.0463(3) -0.5971(7)  3.3(2)

C(20) -0.2823(6)  0.0822(3) -0.5991(7)  3.1(2)

C(21)  0.0512(6)  0.0526(4) -0.6047(6)  3.3(2)

Supplementary Table 1. Atomic coordinates and Biso/Beq and occupancy (continued)

atom    x    y    z  Beq  occ

C(22)  0.0894(7)  0.0436(4) -0.6606(7)  4.1(3)

C(23)  0.1549(8)  0.0672(5) -0.6581(9)  5.4(4)

C(24)  0.1845(8)  0.0992(6) -0.601(1)  6.0(4)

C(25)  0.1477(9)  0.1083(5) -0.5451(9)  5.8(4)

C(26)  0.0817(7)  0.0854(4) -0.5470(7)  4.2(3)

C(27) -0.1237(6) -0.1533(4) -0.7031(7)  3.6(2)

C(28) -0.1333(8) -0.1620(4) -0.7853(8)  4.8(3)

C(29) -0.1159(9) -0.2020(5) -0.807(1)  6.1(4)

C(30) -0.0908(9) -0.2331(5) -0.748(1)  6.1(4)

C(31) -0.0790(9) -0.2247(4) -0.666(1)  5.9(4)

C(32) -0.0943(8) -0.1844(4) -0.6433(9)  5.1(3)

C(33) -0.4412(6) -0.0878(3) -0.5960(7)  3.2(2)

C(34) -0.4225(8) -0.1152(6) -0.5288(9)  6.7(4)

C(35) -0.4812(9) -0.1384(6) -0.513(1)  7.8(5)

C(36) -0.5585(8) -0.1345(4) -0.5652(9)  4.9(3)

C(37) -0.5781(7) -0.1071(5) -0.6301(9)  5.4(3)

C(38) -0.5198(7) -0.0833(5) -0.6451(8)  4.9(3)

C(39) -0.3147(7)  0.1243(3) -0.5891(7)  3.3(2)

C(40) -0.3933(7)  0.1352(4) -0.6373(8)  4.0(3)

C(41) -0.4240(8)  0.1740(4) -0.6252(9)  4.9(3)

C(42) -0.378(1)  0.2021(4) -0.566(1)  5.2(4)

C(43) -0.3007(9)  0.1921(4) -0.5192(9)  4.7(3)

C(44) -0.2683(7)  0.1533(4) -0.5301(8)  3.9(3)

C(45) -0.1970(9)  0.2361(4) -0.676(1)  5.4(4)

C(46) -0.2772(9)  0.1686(4) -0.752(1)  5.3(3)

C(47) -0.2596(7) -0.0339(4) -0.8103(8)  4.4(3)

C(48) -0.3266(7)  0.0357(4) -0.7826(8)  4.4(3)

C(49)  0.6861  0.2266  0.0343  15.7(2)   1/2

H(1) -0.1467 -0.0249 -0.6422  3.711

H(2) -0.1679  0.0153 -0.5740  3.506

H(3) -0.0623  0.1154 -0.6417  4.035

H(4)  0.0853 -0.0396 -0.6106  4.403

H(5)  0.0186 -0.1087 -0.6555  4.517

H(6) -0.2559 -0.1739 -0.6857  4.691

H(7) -0.3700 -0.1524 -0.6473  4.728

Supplementary Table 1. Atomic coordinates and Biso/Beq and occupancy (continued)

atom    x    y    z  Beq  occ

H(8) -0.4480 -0.0059 -0.5350  5.093

H(9) -0.4029  0.0687 -0.5322  4.961

H(10)  0.0702  0.0213 -0.7003  4.862

H(11)  0.1800  0.0611 -0.6969  6.472

H(12)  0.2299  0.1149 -0.5993  7.212

H(13)  0.1678  0.1304 -0.5052  6.963

H(14)  0.0566  0.0921 -0.5085  5.063

H(15) -0.1519 -0.1405 -0.8268  5.705

H(16) -0.1214 -0.2077 -0.8630  7.269

H(17) -0.0812 -0.2609 -0.7643  7.270

H(18) -0.0605 -0.2465 -0.6254  7.129

H(19) -0.0844 -0.1782 -0.5863  6.081

H(20) -0.3686 -0.1183 -0.4925  8.008

H(21) -0.4674 -0.1569 -0.4665  9.403

H(22) -0.5985 -0.1511 -0.5557  5.879

H(23) -0.6322 -0.1041 -0.6658  6.448

H(24) -0.5348 -0.0636 -0.6901  5.916

H(25) -0.4256  0.1159 -0.6783  4.800

H(26) -0.4774  0.1812 -0.6581  5.893

H(27) -0.3997  0.2285 -0.5575  6.221

H(28) -0.2689  0.2118 -0.4789  5.625

H(29) -0.2146  0.1466 -0.4973  4.644

H(30)  0.4979  0.2117  0.7834  3.393

H(31)  0.6696  0.2374  0.0771  17.543   1/2

H(32)  0.6727  0.1973  0.0259  17.543   1/2

Beq = 8/3 2(U11(aa*)2 + U22(bb*)2 + U33(cc*)2 + 2U12(aa*bb*)cos  + 2U13(aa*cc*)cos  + 2U23(bb*cc*)cos )

Supplementary Table 2. Anisotropic Displacement Parameters

atom   U11   U22   U33   U12   U13   U23

Rh(1) 0.0510(5) 0.0374(5) 0.0602(6)  0.0019(4)  0.0237(5)  0.0053(4)

Rh(2) 0.0359(4) 0.0405(4) 0.0419(4)  0.0009(4)  0.0162(3) -0.0042(4)

Cl(1) 0.066(2) 0.062(2) 0.090(3) -0.006(2)  0.010(2) -0.017(2)

O(1) 0.12(1) 0.046(6) 0.16(1)  0.008(6)  0.054(9)  0.029(7)

O(2) 0.11(1) 0.099(9) 0.079(8)  0.002(8) -0.014(7)  0.002(7)

O(3) 0.099(8) 0.114(9) 0.061(6)  0.009(7)  0.044(6) -0.018(6)

O(4) 0.111(9) 0.085(8) 0.085(8)  0.033(7)  0.031(7)  0.036(7)

N(1) 0.044(5) 0.035(4) 0.049(5)  0.000(4)  0.021(4)  -0.000(4)

N(2) 0.031(4) 0.039(5) 0.051(5)  0.002(4)  0.018(4) -0.005(4)

N(3) 0.038(5) 0.036(5) 0.050(5)  0.000(4)  0.021(4) -0.006(4)

N(4) 0.037(4) 0.034(4) 0.053(5)  -0.001(4)  0.024(4) -0.007(4)

C(1) 0.040(5) 0.032(5) 0.042(6)  -0.001(4)  0.016(5)  -0.003(4)

C(2) 0.038(5) 0.033(5) 0.041(5)  -0.001(4)  0.016(4)  -0.003(4)

C(3) 0.043(6) 0.041(6) 0.048(6)  -0.004(5)  0.021(5)  -0.003(5)

C(4) 0.036(5) 0.042(6) 0.036(5)  -0.002(4)  0.013(4)  -0.003(4)

C(5) 0.032(5) 0.047(6) 0.033(5)  -0.002(4)  0.012(4)  -0.002(4)

C(6) 0.034(5) 0.046(6) 0.037(5)  0.002(5)  0.014(4)  -0.003(5)

C(7) 0.035(5) 0.056(7) 0.051(7)  0.003(5)  0.019(5)  -0.005(5)

C(8) 0.044(6) 0.048(6) 0.054(7)  0.008(5)  0.022(5) -0.006(5)

C(9) 0.041(6) 0.042(6) 0.044(6)  0.004(5)  0.019(5) -0.005(5)

C(10) 0.043(6) 0.039(6) 0.045(6)  0.003(5)  0.018(5) -0.009(5)

C(11) 0.043(6) 0.035(5) 0.047(6)  0.002(4)  0.018(5) -0.008(5)

C(12) 0.046(6) 0.038(6) 0.065(8)  -0.001(5)  0.021(6) -0.012(5)

C(13) 0.046(6) 0.038(6) 0.068(8) -0.006(5)  0.023(6) -0.006(5)

C(14) 0.037(5) 0.037(5) 0.051(6)  -0.002(4)  0.017(5) -0.005(5)

C(15) 0.035(5) 0.039(5) 0.051(6)  -0.001(4)  0.019(5)  -0.003(5)

C(16) 0.039(6) 0.039(6) 0.056(7)  -0.002(4)  0.024(5) -0.005(5)

C(17) 0.056(7) 0.048(7) 0.074(8)  -0.005(5)  0.044(7) -0.008(6)

C(18) 0.056(7) 0.044(6) 0.072(8)  -0.000(5)  0.041(7) -0.009(6)

C(19) 0.043(6) 0.036(5) 0.053(6)  0.002(4)  0.025(5)  -0.004(5)

C(20) 0.043(6) 0.036(5) 0.044(6)  -0.000(4)  0.021(5)  -0.004(4)

C(21) 0.033(5) 0.053(6) 0.038(6)  -0.001(5)  0.013(4)  -0.000(5)

C(22) 0.039(6) 0.068(8) 0.050(7)  -0.001(6)  0.019(5)  -0.004(6)

C(23) 0.044(7) 0.10(1) 0.068(9)  -0.003(7)  0.030(7)  0.008(8)

C(24) 0.046(8) 0.11(1) 0.07(1) -0.025(8)  0.021(7)  0.004(9)

Supplementary Table 2. Anisotropic Displacement Parameters (continued)

atom   U11   U22   U33   U12   U13   U23

C(25) 0.063(9) 0.09(1) 0.057(8) -0.035(8)  0.008(7) -0.010(8)

C(26) 0.050(7) 0.064(8) 0.044(6) -0.014(6)  0.015(5) -0.006(6)

C(27) 0.039(6) 0.043(6) 0.060(7)  0.000(5)  0.023(5) -0.017(5)

C(28) 0.068(8) 0.059(8) 0.058(8)  0.004(6)  0.028(7) -0.016(6)

C(29) 0.08(1) 0.08(1) 0.07(1)  0.005(8)  0.033(8) -0.037(9)

C(30) 0.069(9) 0.055(8) 0.10(1)  0.011(7)  0.026(9) -0.034(8)

C(31) 0.07(1) 0.053(8) 0.10(1)  0.023(7)  0.029(9)  -0.003(8)

C(32) 0.072(9) 0.054(8) 0.066(9)  0.021(7)  0.025(7)  -0.005(6)

C(33) 0.037(5) 0.038(5) 0.051(6)  -0.001(4)  0.021(5)  -0.000(5)

C(34) 0.039(7) 0.14(1) 0.07(1)  -0.006(8)  0.012(7)  0.04(1)

C(35) 0.057(9) 0.15(2) 0.09(1)  0.00(1)  0.031(9)  0.07(1)

C(36) 0.053(7) 0.063(8) 0.080(9) -0.007(6)  0.036(7)  0.010(7)

C(37) 0.038(7) 0.10(1) 0.065(9) -0.011(7)  0.014(6)  0.012(8)

C(38) 0.045(7) 0.076(9) 0.062(8)  -0.001(6)  0.015(6)  0.025(7)

C(39) 0.049(6) 0.032(5) 0.056(7)  0.003(5)  0.031(5)  0.001(5)

C(40) 0.051(7) 0.047(6) 0.060(7)  0.006(5)  0.027(6)  0.005(6)

C(41) 0.067(8) 0.053(8) 0.08(1)  0.022(7)  0.046(8)  0.025(7)

C(42) 0.09(1) 0.035(6) 0.10(1)  0.014(7)  0.068(9)  0.015(7)

C(43) 0.09(1) 0.035(6) 0.076(9) -0.007(6)  0.053(8) -0.008(6)

C(44) 0.056(7) 0.040(6) 0.061(7)  -0.004(5)  0.033(6)  -0.003(5)

C(45) 0.067(9) 0.050(8) 0.09(1)  0.006(7)  0.036(8)  0.012(7)

C(46) 0.07(1) 0.052(8) 0.067(9)  0.008(7)  0.018(8)  0.007(7)

C(47) 0.053(7) 0.064(8) 0.050(7)  0.002(6)  0.020(6) -0.006(6)

C(48) 0.052(7) 0.064(8) 0.053(7)  0.005(6)  0.022(6)  0.007(6)

The general temperature factor expression:

exp(-22(a*2U11h2 + b*2U22k2 + c*2U33l2 + 2a*b*U12hk + 2a*c*U13hl + 2b*c*U23kl))

Supplementary Table 3. Bond Lengths(Å)

atom atom distance atom atom distance

RH1 CL1 2.349(3) RH1 N1 2.104(6)

RH1 C45 1.857(9) RH1 C46 1.84(1)

RH2 N3 2.099(6) RH2 N4 2.077(6)

RH2 C47 1.863(9) RH2 C48 1.867(9)

CL2 CL3 2.05 CL2 C49 1.77

CL3 C49 1.61 O1 C45 1.12(1)

O2 C46 1.12(1) O3 C47 1.13(1)

O4 C48 1.12(1) N1 C1 1.431(9)

N1 C3 1.310(9) N2 C6 1.383(9)

N2 C9 1.367(9) N3 C11 1.383(9)

N3 C14 1.403(9) N4 C16 1.372(9)

N4 C19 1.389(9) C1 C2 1.402(9)

C1 C20 1.41(1) C2 C4 1.408(9)

C3 C4 1.44(1) C4 C5 1.43(1)

C5 C6 1.39(1) C5 C21 1.49(1)

C6 C7 1.43(1) C7 C8 1.36(1)

C8 C9 1.44(1) C9 C10 1.40(1)

C10 C11 1.41(1) C10 C27 1.52(1)

C11 C12 1.45(1) C12 C13 1.35(1)

C13 C14 1.45(1) C14 C15 1.39(1)

C15 C16 1.40(1) C15 C33 1.49(1)

C16 C17 1.43(1) C17 C18 1.36(1)

C18 C19 1.44(1) C19 C20 1.41(1)

C20 C39 1.483(9) C21 C22 1.40(1)

C21 C26 1.40(1) C22 C23 1.38(1)

C23 C24 1.37(1) C24 C25 1.37(1)

C25 C26 1.38(1) C27 C28 1.39(1)

C27 C32 1.38(1) C28 C29 1.38(1)

C29 C30 1.36(2) C30 C31 1.37(1)

C31 C32 1.38(1) C33 C34 1.38(1)

C33 C38 1.37(1) C34 C35 1.39(1)

C35 C36 1.36(1) C36 C37 1.35(1)

C37 C38 1.39(1) C39 C40 1.40(1)

C39 C44 1.39(1) C40 C41 1.39(1)

C41 C42 1.38(1) C42 C43 1.37(1)

Supplementary Table 3. Bond Lengths(Å) (continued)

atom atom distance atom atom distance C43 C44 1.39(1)

O6 H30 1.13 O6 H30 1.13

N2 H1 0.95 C2 H2 0.95

C3 H3 0.95 C7 H4 0.95

C8 H5 0.95 C12 H6 0.95

C13 H7 0.95 C17 H8 0.95

C18 H9 0.95 C22 H10 0.95

C23 H11 0.95 C24 H12 0.95

C25 H13 0.95 C26 H14 0.95

C28 H15 0.95 C29 H16 0.95

C30 H17 0.95 C31 H18 0.95

C32 H19 0.95 C34 H20 0.95

C35 H21 0.95 C36 H22 0.95

C37 H23 0.95 C38 H24 0.95

C40 H25 0.95 C41 H26 0.95

C42 H27 0.95 C43 H28 0.95

C44 H29 0.95 C49 H31 0.95

C49 H32 0.95

Supplementary Table 4. Bond Angles(o)

atom atom atom angle atom atom atom angle

CL1 RH1 N1 87.6(2) CL1 RH1 C45 87.0(3)

CL1 RH1 C46 177.6(3) N1 RH1 C45 171.5(4)

N1 RH1 C46 94.5(3) C45 RH1 C46 90.8(4)

N3 RH2 N4 85.7(2) N3 RH2 C47 92.8(3)

N3 RH2 C48 172.5(3) N4 RH2 C47 178.2(3)

N4 RH2 C48 91.9(3) C47 RH2 C48 89.5(4)

CL3 CL2 C49 87.272(1) CL2 CL3 C49　　　140.44(1)

RH1 N1 C1 136.0(5) RH1 N1 C3 117.2(5)

C1 N1 C3 106.7(6) C6 N2 C9 111.5(6)

RH2 N3 C11 129.5(5) RH2 N3 C14 111.0(5)

C11 N3 C14 106.4(6) RH2 N4 C16 118.0(5)

RH2 N4 C19 130.2(5) C16 N4 C19 107.3(6)

N1 C1 C2 108.1(6) N1 C1 C20 122.6(6)

C2 C1 C20 129.3(7) C1 C2 C4 108.5(6)

N1 C3 C4 112.7(6) C2 C4 C3 103.9(6)

C2 C4 C5 131.9(7) C3 C4 C5 124.0(7)

C4 C5 C6 121.8(6) C4 C5 C21 118.0(7)

C6 C5 C21 120.1(6) N2 C6 C5 123.3(6)

N2 C6 C7 105.3(6) C5 C6 C7 131.2(7)

C6 C7 C8 108.9(7) C7 C8 C9 108.2(7)

N2 C9 C8 106.0(6) N2 C9 C10 126.5(7)

C8 C9 C10 127.4(7) C9 C10 C11 127.7(7)

C9 C10 C27 116.7(6) C11 C10 C27 115.2(7)

N3 C11 C10 128.4(7) N3 C11 C12 109.2(6)

C10 C11 C12 122.0(7) C11 C12 C13 107.8(7)

C12 C13 C14 107.7(7) N3 C14 C13 108.7(6)

N3 C14 C15 126.1(7) C13 C14 C15 125.1(7)

C14 C15 C16 124.4(7) C14 C15 C33 117.4(6)

C16 C15 C33 118.1(6) N4 C16 C15 123.9(6)

N4 C16 C17 109.2(6) C15 C16 C17 126.8(7)

C16 C17 C18 107.6(7) C17 C18 C19 107.5(7)

N4 C19 C18 108.3(6) N4 C19 C20 126.8(6)

C18 C19 C20 124.5(7) C1 C20 C19 122.0(6)

C1 C20 C39 121.3(6) C19 C20 C39 116.6(6)

C5 C21 C22 121.2(7) C5 C21 C26 120.6(7)

Supplementary Table 4. Bond Angles(o) (continued)

atom atom atom angle atom atom atom angle

C22 C21 C26 118.1(7) C21 C22 C23 119.9(8)

C22 C23 C24 121.2(9) C23 C24 C25 119.4(9)

C24 C25 C26 120.3(9) C21 C26 C25 121.0(8)

C10 C27 C28 119.5(8) C10 C27 C32 121.1(7)

C28 C27 C32 119.3(8) C27 C28 C29 119.9(9)

C28 C29 C30 120.4(9) C29 C30 C31 120.4(9)

C30 C31 C32 120(1) C27 C32 C31 120.0(9)

C15 C33 C34 121.8(7) C15 C33 C38 120.6(7)

C34 C33 C38 117.6(7) C33 C34 C35 121.1(9)

C34 C35 C36 120.0(9) C35 C36 C37 119.7(8)

C36 C37 C38 120.5(8) C33 C38 C37 121.0(8)

C20 C39 C40 120.4(7) C20 C39 C44 120.6(7)

C40 C39 C44 118.9(7) C39 C40 C41 120.1(8)

C40 C41 C42 120.5(9) C41 C42 C43 120.0(8)

C42 C43 C44 120.6(9) C39 C44 C43 119.9(8)

RH1 C45 O1 177(1) RH1 C46 O2 179(1)

RH2 C47 O3 178.4(9) RH2 C48 O4 176.6(9)

CL2 C49 CL3 132.2733(5)

H30 O6 H30 62.7 C6 N2 H1 124.3

C9 N2 H1 124.3 C1 C2 H2 125.7

C4 C2 H2 125.8 N1 C3 H3 123.6

C4 C3 H3 123.6 C6 C7 H4 125.6

C8 C7 H4 125.5 C7 C8 H5 125.9

C9 C8 H5 125.9 C11 C12 H6 126.1

C13 C12 H6 126.1 C12 C13 H7 126.2

C14 C13 H7 126.2 C16 C17 H8 126.2

C18 C17 H8 126.2 C17 C18 H9 126.2

C19 C18 H9 126.3 C21 C22 H10 120.0

C23 C22 H10 120.1 C22 C23 H11 119.4

C24 C23 H11 119.4 C23 C24 H12 120.3

C25 C24 H12 120.3 C24 C25 H13 119.9

C26 C25 H13 119.8 C21 C26 H14 119.5

C25 C26 H14 119.5 C27 C28 H15 120.1

C29 C28 H15 120.0 C28 C29 H16 119.8

C30 C29 H16 119.8 C29 C30 H17 119.8

Supplementary Table 4. Bond Angles(o) (continued)

atom atom atom angle atom atom atom angle

C31 C30 H17 119.8 C30 C31 H18 120.1

C32 C31 H18 120.2 C27 C32 H19 120.0

C31 C32 H19 120.0 C33 C34 H20 119.5

C35 C34 H20 119.5 C34 C35 H21 120.0

C36 C35 H21 120.0 C35 C36 H22 120.2

C37 C36 H22 120.1 C36 C37 H23 119.7

C38 C37 H23 119.7 C33 C38 H24 119.5

C37 C38 H24 119.5 C39 C40 H25 120.0

C41 C40 H25 120.0 C40 C41 H26 119.8

C42 C41 H26 119.7 C41 C42 H27 120.1

C43 C42 H27 120.0 C42 C43 H28 119.7

C44 C43 H28 119.7 C39 C44 H29 120.1

C43 C44 H29 120.1 CL2 C49 H31 103.5

CL2 C49 H32 103.5 CL3 C49 H31 103.5

CL3 C49 H32 103.5 H31 C49 H32 109.5

Supplementary Table 5. Torsion Angles(o)

atom atom atom atom angle atom atom atom atom angle

RH1 N1 C1 C2 -176.6(5) RH1 N1 C1 C20    3(1)

RH1 N1 C3 C4  177.8(5) RH2 N3 C11 C10   55(1)

RH2 N3 C11 C12 -132.4(6) RH2 N3 C14 C13  141.8(6)

RH2 N3 C14 C15  -40.8(9) RH2 N4 C16 C15   24(1)

RH2 N4 C16 C17 -158.5(6) RH2 N4 C19 C18  154.2(6)

RH2 N4 C19 C20  -32(1) CL1 RH1 N1 C1  113.7(7)

CL1 RH1 N1 C3  -63.5(6) CL1 RH1 C45 O1   42(19)

CL1 RH1 C46 O2    9(68) O1 C45 RH1 N1   -8(21)

O1 C45 RH1 C46 -137(19) O2 C46 RH1 N1 -141(61)

O2 C46 RH1 C45   33(61) O3 C47 RH2 N3 -105(32)

O3 C47 RH2 N4 -138(27) O3 C47 RH2 C48   82(32)

O4 C48 RH2 N3  -30(16) O4 C48 RH2 N4 -101(15)

O4 C48 RH2 C47   78(15) N1 C1 C2 C4   -1.2(8)

N1 C1 C20 C19  164.1(7) N1 C1 C20 C39  -20(1)

N1 C3 C4 C2   -0.6(9) N1 C3 C4 C5  174.4(7)

N2 C6 C5 C4    7(1) N2 C6 C5 C21 -167.9(6)

N2 C6 C7 C8    2.9(9) N2 C9 C8 C7   -0.6(9)

N2 C9 C10 C11  -10(1) N2 C9 C10 C27  177.1(7)

N3 RH2 N4 C16  -48.5(5) N3 RH2 N4 C19  158.4(7)

N3 C11 C10 C9   10(1) N3 C11 C10 C27 -177.0(7)

N3 C11 C12 C13   -3(1) N3 C14 C13 C12    2(1)

N3 C14 C15 C16   -0(1) N3 C14 C15 C33 -175.8(7)

N4 RH2 N3 C11 -171.0(6) N4 RH2 N3 C14   53.8(5)

N4 C16 C15 C14   11(1) N4 C16 C15 C33 -173.2(7)

N4 C16 C17 C18    1(1) N4 C19 C18 C17    2(1)

N4 C19 C20 C1  -21(1) N4 C19 C20 C39  162.7(7)

C1 N1 RH1 C45  164(3) C1 N1 RH1 C46  -67.5(8)

C1 N1 C3 C4   -0.1(9) C1 C2 C4 C3    1.1(8)

C1 C2 C4 C5 -173.4(7) C1 C20 C19 C18  151.5(8)

C1 C20 C39 C40  134.3(8) C1 C20 C39 C44  -48(1)

C2 C1 N1 C3    0.8(8) C2 C1 C20 C19  -16(1)

C2 C1 C20 C39  159.8(8) C2 C4 C5 C6   21(1)

C2 C4 C5 C21 -164.2(7) C3 N1 RH1 C45  -13(3)

C3 N1 RH1 C46  115.3(6) C3 N1 C1 C20 -179.3(7)

C3 C4 C5 C6 -152.7(7) C3 C4 C5 C21   22(1)

Supplementary Table 5. Torsion Angles(o) (continued)

atom atom atom atom angle atom atom atom atom angle

C4 C2 C1 C20  179.0(7) C4 C5 C6 C7 -177.5(7)

C4 C5 C21 C22 -132.4(8) C4 C5 C21 C26   44(1)

C5 C6 N2 C9  173.1(7) C5 C6 C7 C8 -173.2(8)

C5 C21 C22 C23  176.4(8) C5 C21 C26 C25 -177.0(8)

C6 N2 C9 C8    2.6(9) C6 N2 C9 C10  178.5(7)

C6 C5 C21 C22   43(1) C6 C5 C21 C26 -140.5(8)

C6 C7 C8 C9   -1.4(9) C7 C6 N2 C9   -3.4(8)

C7 C6 C5 C21    8(1) C7 C8 C9 C10 -176.5(8)

C8 C9 C10 C11  164.8(8) C8 C9 C10 C27   -8(1)

C9 C10 C11 C12 -161.0(8) C9 C10 C27 C28  -89(1)

C9 C10 C27 C32   92(1) C10 C11 N3 C14 -167.9(8)

C10 C11 C12 C13  169.4(8) C10 C27 C28 C29 -176.8(9)

C10 C27 C32 C31  175.1(9) C11 N3 RH2 C47   10.0(7)

C11 N3 RH2 C48  117(2) C11 N3 C14 C13   -3.6(9)

C11 N3 C14 C15  173.7(8) C11 C10 C27 C28   97.7(9)

C11 C10 C27 C32  -81(1) C11 C12 C13 C14    1(1)

C12 C11 N3 C14    4.3(9) C12 C11 C10 C27   12(1)

C12 C13 C14 C15 -175.8(8) C13 C14 C15 C16  176.5(8)

C13 C14 C15 C33    1(1) C14 N3 RH2 C47 -125.2(5)

C14 N3 RH2 C48  -18(3) C14 C15 C16 C17 -165.7(8)

C14 C15 C33 C34   67(1) C14 C15 C33 C38 -111.8(9)

C15 C16 N4 C19 -177.2(8) C15 C16 C17 C18  178.1(8)

C15 C33 C34 C35 -177(1) C15 C33 C38 C37  175.7(9)

C16 N4 RH2 C47  -15(10) C16 N4 RH2 C48  124.3(6)

C16 N4 C19 C18   -1.1(9) C16 N4 C19 C20  172.5(8)

C16 C15 C33 C34 -109(1) C16 C15 C33 C38   72(1)

C16 C17 C18 C19   -1(1) C17 C16 N4 C19    0.3(9)

C17 C16 C15 C33    10(1) C17 C18 C19 C20 -172.3(8)

C18 C19 C20 C39  -25(1) C19 N4 RH2 C47 -168(10)

C19 N4 RH2 C48  -28.8(7) C19 C20 C39 C40  -50(1)

C19 C20 C39 C44  128.6(8) C20 C39 C40 C41  177.5(7)

C20 C39 C44 C43 -177.4(7) C21 C22 C23 C24    1(2)

C21 C26 C25 C24    0(2) C22 C21 C26 C25   -0(1)

C22 C23 C24 C25   -1(2) C23 C22 C21 C26   -0(1)

C23 C24 C25 C26    0(2) C27 C28 C29 C30    1(2)

Supplementary Table 5. Torsion Angles(o) (continued)

atom atom atom atom angle atom atom atom atom angle

C27 C32 C31 C30    2(2) C28 C27 C32 C31   -4(1)

C28 C29 C30 C31   -3(2) C29 C28 C27 C32    2(1)

C29 C30 C31 C32    1(2) C33 C34 C35 C36    0(2)

C33 C38 C37 C36    2(2) C34 C33 C38 C37   -3(2)

C34 C35 C36 C37   -2(2) C35 C34 C33 C38    2(2)

C35 C36 C37 C38    1(2) C39 C40 C41 C42   -0(1)

C39 C44 C43 C42    0(1) C40 C39 C44 C43    1(1)

C40 C41 C42 C43    1(1) C41 C40 C39 C44   -1(1)

C41 C42 C43 C44   -1(1)

Supplementary Table 6. Least Squares Planes

Plane number 1

Atoms defining plane Distance

N1 -0.566(6)

N2  0.004(6)

N3 -0.303(6)

N4 -0.209(6)

C1 -0.101(7)

C2  0.339(7)

C3 -0.422(7)

C4  0.137(7)

C5  0.289(7)

C6  0.288(7)

C7  0.468(8)

C8  0.230(8)

C9 -0.079(7)

C10 -0.321(7)

C11 -0.332(7)

C12 -0.192(9)

C13 -0.007(9)

C14 -0.049(7)

C15  0.187(7)

C16  0.213(8)

C17  0.718(9)

C18  0.590(9)

C19  0.026(8)

C20 -0.116(7)

Additional Atoms Distance

RH1 -1.302

RH2 -1.579

Plane number 2

Atoms defining plane Distance

RH1 -0.0019(6)

N1  0.049(6)

CL1  0.002(3)

C45  0.16(1)

C46  0.04(1)

Plane number 3

Atoms defining plane Distance

RH2  0.0016(6)

N3 -0.064(6)

N4 -0.007(6)

C47 -0.024(9)

C48 -0.167(9)

Summary

plane mean deviation 

1 0.2577 45018.6

2 0.0504 376.2

3 0.0527 507.2

Supplementary Figure 1. View of C48H29N4Rh2O4Cl, *bis*-Rh(I)NCTPP (**2**), showing the atom labeling scheme. Thermal ellipsoids are scaled to the 50% probability level. Hydrogen atoms shown are drawn to an arbitrary scale.


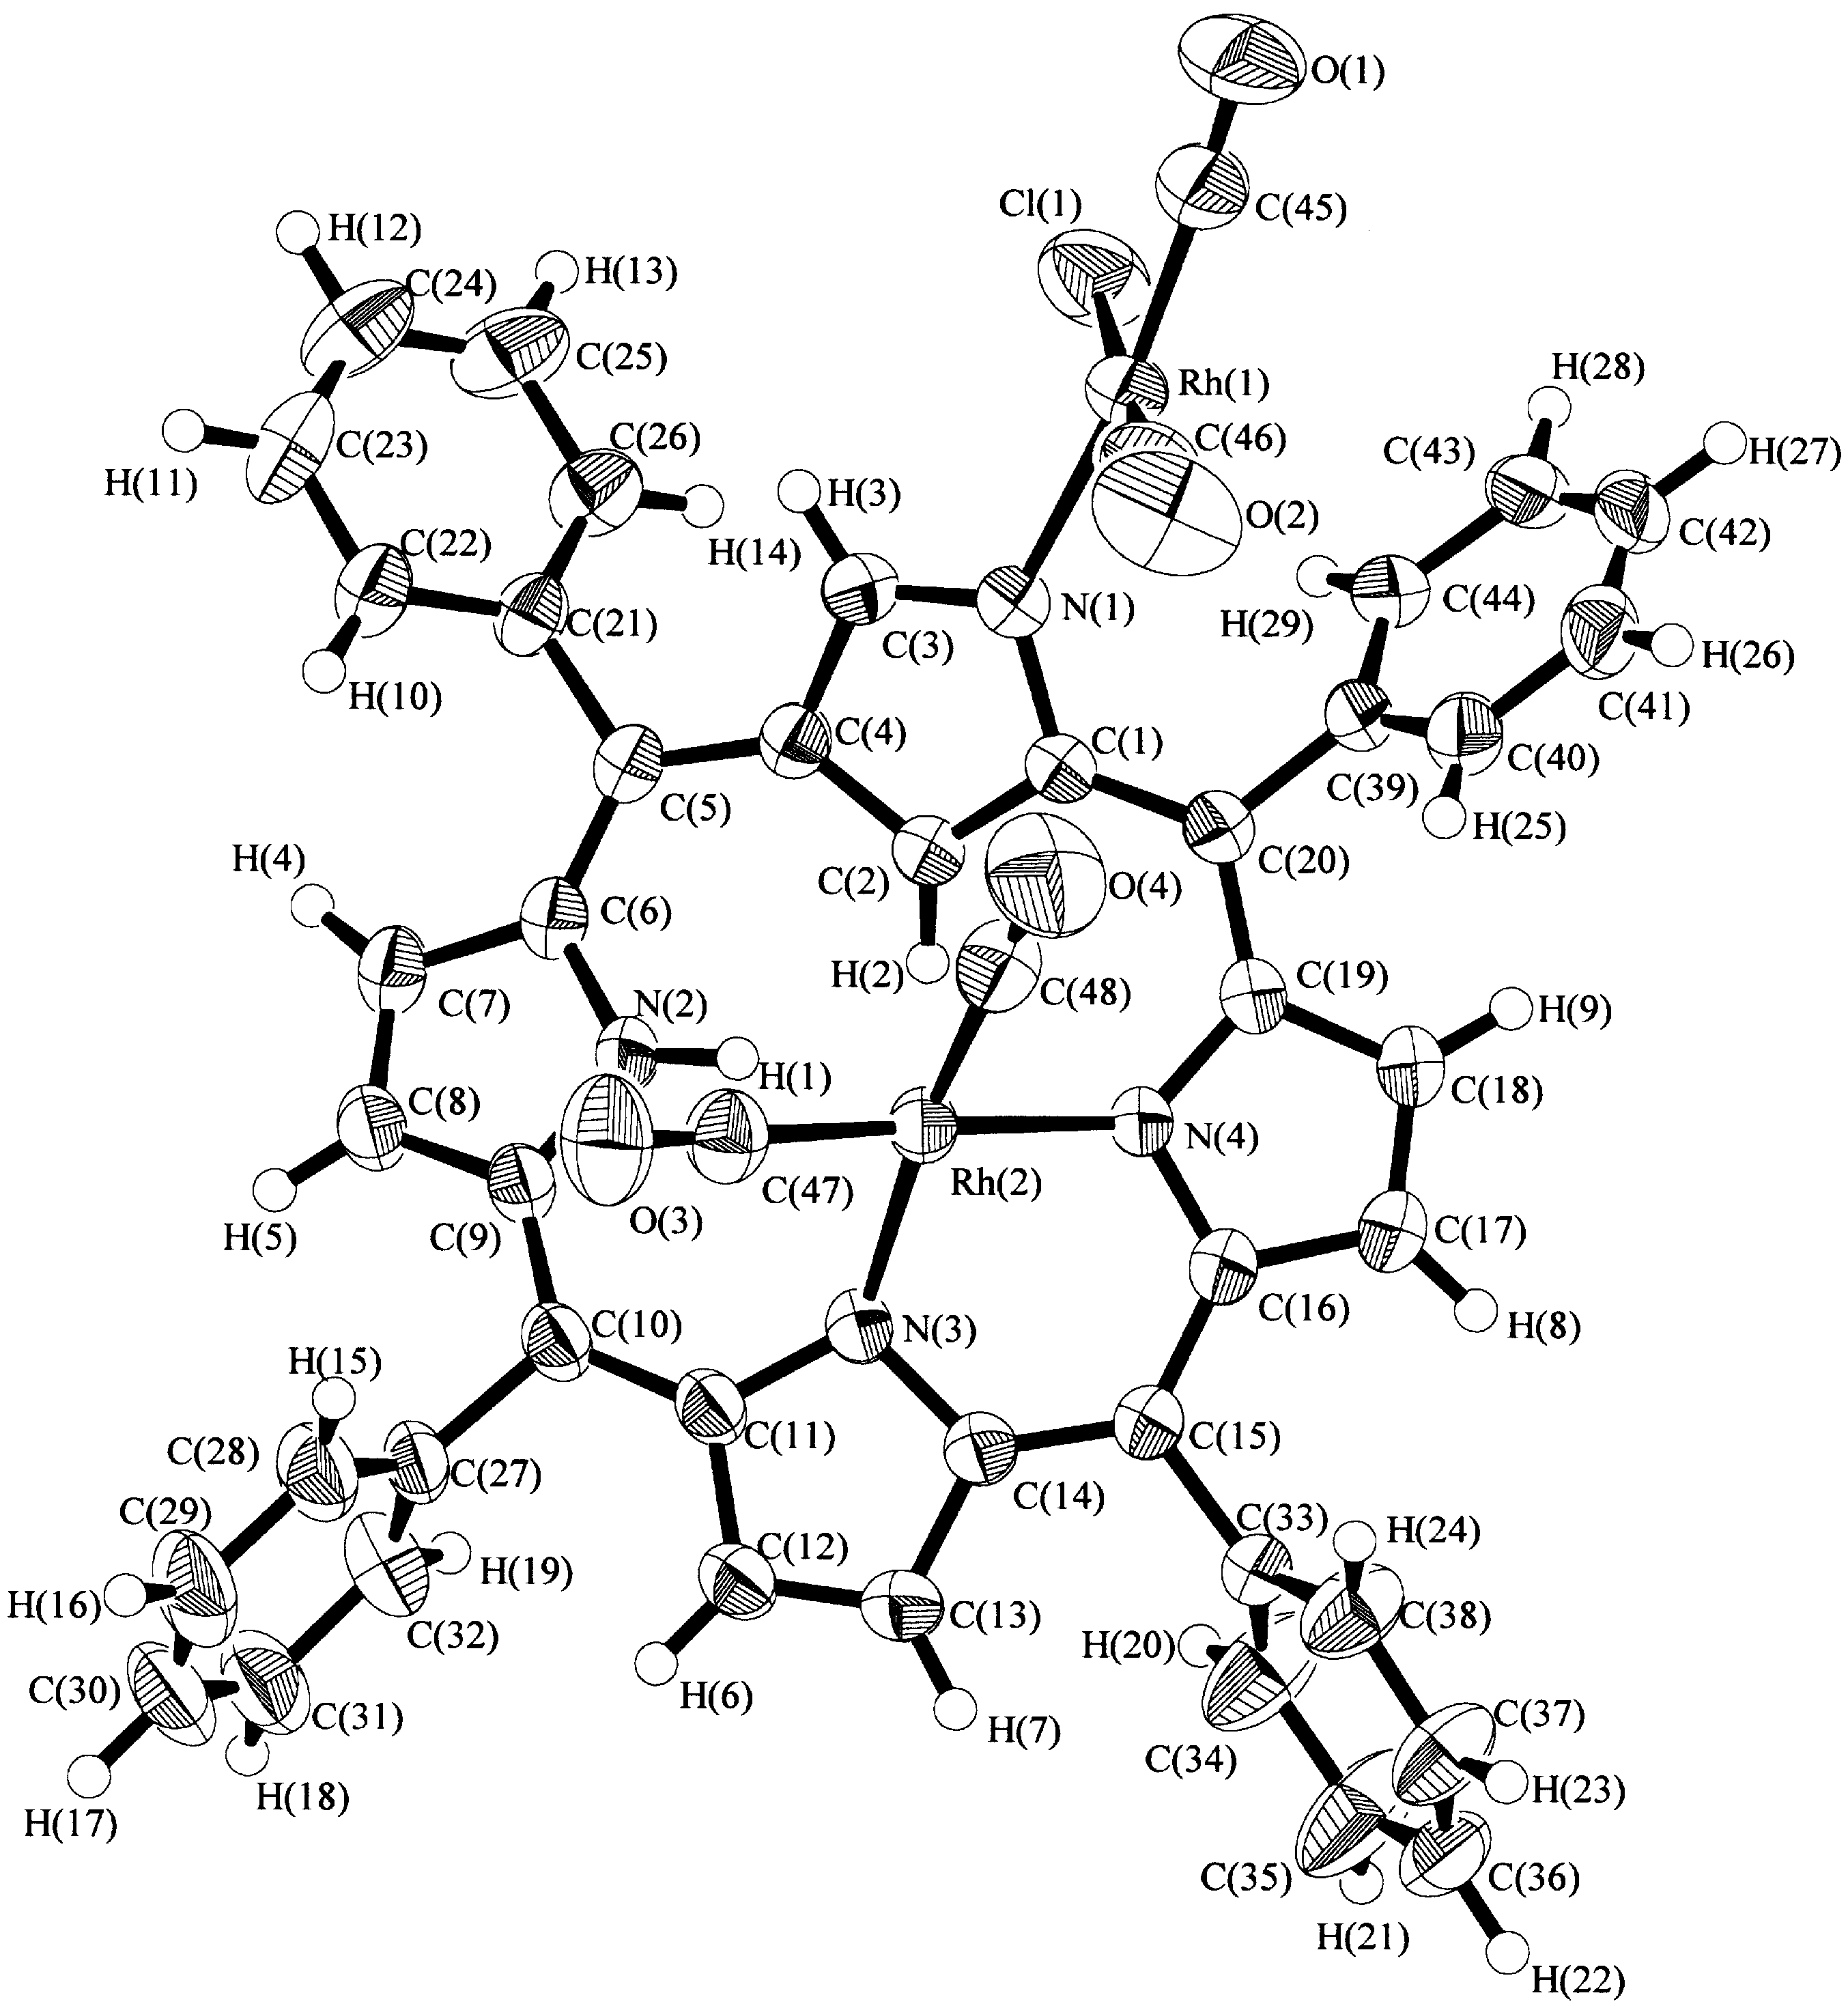


Supplementary Figure 2. Unit cell packing diagram for *bis*-Rh(I)NCTPP (**2**).


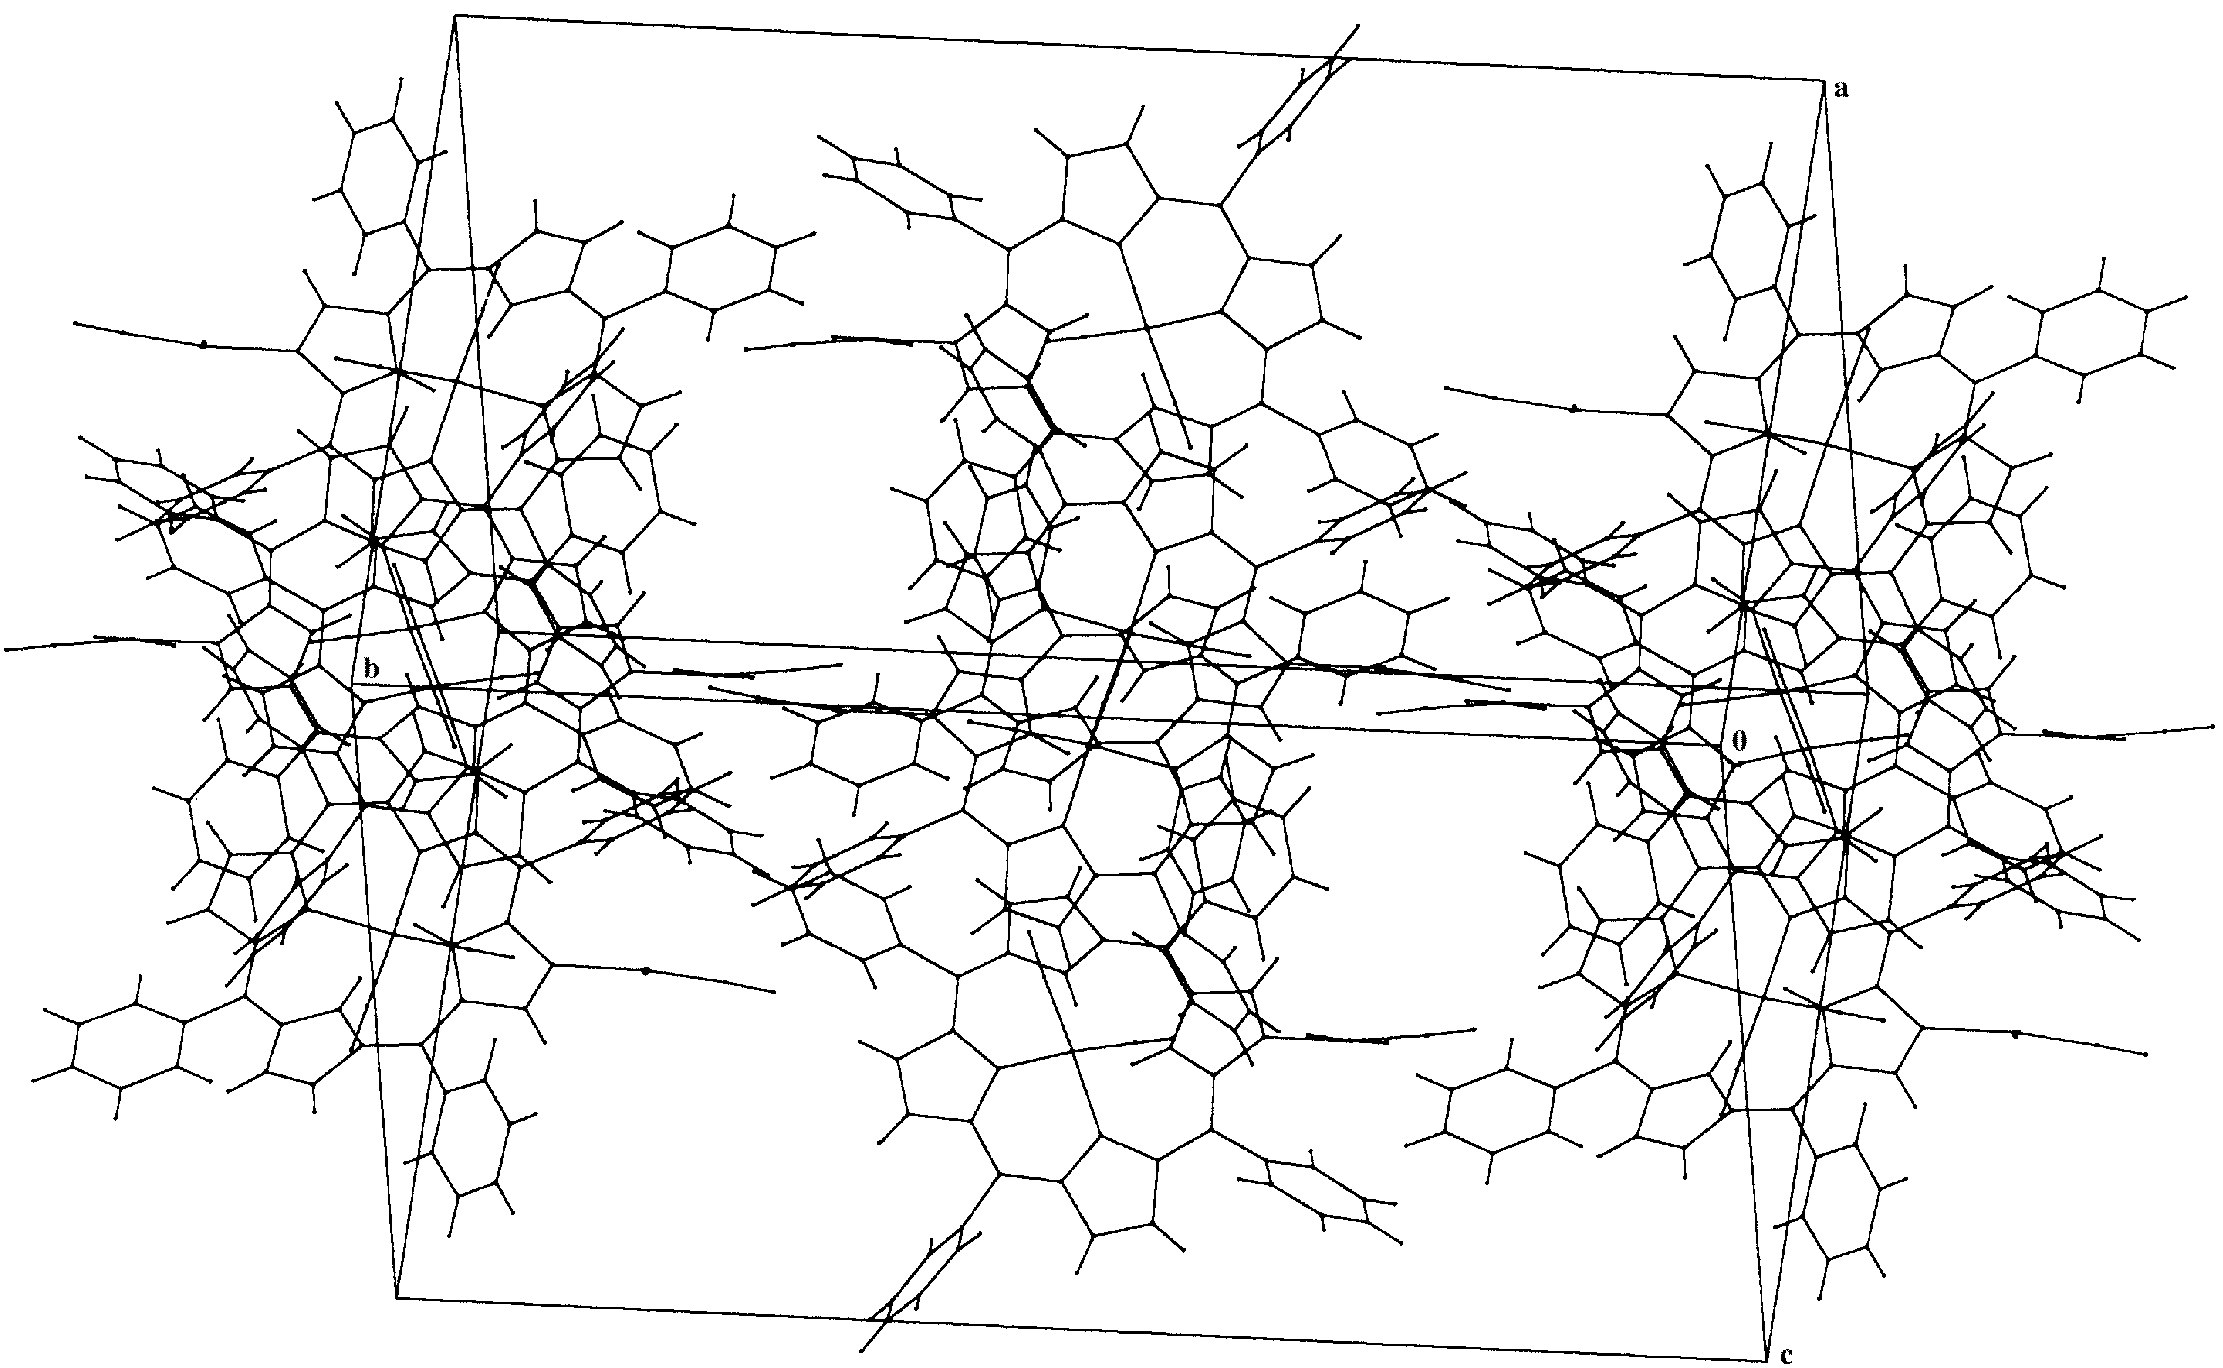


Supplementary X-ray information for *bis*- Rh(I)TPP (**4**)

X-ray Experimental.

Crystallographic Data for *bis*-Rh(I)TPP (**4**).

Supplementary Table 1’. Atomic Coordinates and Biso/Beq for *bis*-Rh(I)TPP (**4**).

Supplementary Table 2’. Anistropic displacement parameter for *bis*-Rh(I)TPP (**4**).

Supplementary Table 3’. Bond lengths (Å) for *bis*-Rh(I)TPP (**4**).

Supplementary Table 4’. Bond Angles (°) for *bis*-Rh(I)TPP (**4**).

Supplementary Table 5’. Torsion Angles (°) for *bis*-Rh(I)TPP (**4**).

Supplementary Table 6’. Least Squares Planes.

Supplementary Figure 1’. View of C49H30N4Rh2O4Cl2, *bis*-Rh(I)TPP (**4**), showing the atom labeling scheme. Thermal ellipsoids are scaled to the 50% probability level. Hydrogen atoms shown are drawn to an arbitrary scale.

Supplementary Figure 2’. Unit cell packing diagram for *bis*-Rh(I)TPP (**4**).

*Experimental*

Data Collection

A brown prism crystal of C49H30N4Rh2O4Cl2 having approximate dimensions of 0.10 x 0.10 x 0.10 mm was mounted on a glass fiber. All measurements were made on a Rigaku RAXIS imaging plate area detector with graphite monochromated Mo-K radiation.

Indexing was performed from 2 stills which were exposed for 0.8 minutes. The crystal-to-detector distance was 110.00 mm. The detector swing angle was 5.00o. Readout was performed in the 0.100 mm pixel mode.

Cell constants and an orientation matrix for data collection corresponded to a C-centered monoclinic cell with dimensions:

a = 21.695(2) Å

b = 11.1778(7) Å  = 120.957(3)o

c = 21.600(1) Å

V = 4492.0(5) Å3

For Z = 4 and F.W. = 1015.52, the calculated density is 1.50 g/cm3. Based on the systematic absences of:

hkl: h+k ± 2n

h0l: l ± 2n

packing considerations, a statistical analysis of intensity distribution, and the successful solution and refinement of the structure, the space group was determined to be:

C2/c (#15)

The data were collected at a temperature of 23 + 1oC to a maximum 2 value of 55.0o. A total of 44 (220.00o) oscillation images were collected, each being exposed for 25.0 minutes. The crystal-to-detector distance was 110.00 mm. The detector swing angle was 5.00o. Readout was performed in the 0.100 mm pixel mode.

Data Reduction

A total of 5415 reflections was collected.

The linear absorption coefficient, , for Mo-K radiation is 9.0 cm-1. A symmetry-related absorption correction using the program ABSCOR was applied which resulted in transmission factors ranging from 0.95 to 1.05. The data were corrected for Lorentz and polarization effects.

Structure Solution and Refinement

The structure was solved by direct methods1 and expanded using Fourier techniques2. Some non-hydrogen atoms were refined anisotropically, while the rest were refined isotropically. Hydrogen atoms were included but not refined. The final cycle of full-matrix least-squares refinement3 on F was based on 3009 observed reflections (I > 3.00(I)) and 264 variable parameters and converged (largest parameter shift was 0.01 times its esd) with unweighted and weighted agreement factors of:

R =  ||Fo| - |Fc|| /  |Fo| = 0.047

Rw = [  w (|Fo| - |Fc|)2 /  w Fo2]1/2 = 0.075

The standard deviation of an observation of unit weight4 was 1.91. The weighting scheme was based on counting statistics and included a factor (p = 0.050) to downweight the intense reflections. Plots of  w (|Fo| - |Fc|)2 versus |Fo|, reflection order in data collection, sin / and various classes of indices showed no unusual trends. The maximum and minimum peaks on the final difference Fourier map corresponded to 2.86 and -0.79 e‑/Å3, respectively.

Neutral atom scattering factors were taken from Cromer and Waber5. Anomalous dispersion effects were included in Fcalc6; the values for f' and f" were those of Creagh and McAuley7. The values for the mass attenuation coefficients are those of Creagh and Hubbell8. All calculations were performed using the teXsan9 crystallographic software package of Molecular Structure Corporation.

*References*

(1) SIR92: Altomare, A., Cascarano, M., Giacovazzo, C., Guagliardi, A. (1994). J. Appl. Cryst., 26, 343.

(2) DIRDIF94: Beurskens, P.T., Admiraal, G., Beurskens, G., Bosman, W.P., de Gelder, R., Israel, R. and Smits, J.M.M.(1994). The DIRDIF-94 program system, Technical Report of the Crystallography Laboratory, University of Nijmegen, The Netherlands.

(3) Least Squares function minimized:

*w*(|Fo|-|Fc|)2

(4) Standard deviation of an observation of unit weight:

[*w*(|Fo|-|Fc|)2/(No-Nv)]1/2

where: No = number of observations

Nv = number of variables

(5) Cromer, D. T. & Waber, J. T.; "International Tables for X-ray Crystallography", Vol. IV, The Kynoch Press, Birmingham, England, Table 2.2 A (1974).

(6) Ibers, J. A. & Hamilton, W. C.; Acta Crystallogr., 17, 781 (1964).

(7) Creagh, D. C. & McAuley, W.J .; "International Tables for Crystallography", Vol C, (A.J.C. Wilson, ed.), Kluwer Academic Publishers, Boston, Table 4.2.6.8, pages 219-222 (1992).

(8) Creagh, D. C. & Hubbell, J.H..; "International Tables for Crystallography", Vol C, (A.J.C. Wilson, ed.), Kluwer Academic Publishers, Boston, Table 4.2.4.3, pages 200-206 (1992).

(9) teXsan for Windows version 1.06: Crystal Structure Analysis Package, Molecular Structure Corporation (1997-9).

*EXPERIMENTAL DETAILS*

A. Crystal Data

Empirical Formula C49H30N4Rh2O4Cl2

Formula Weight 1015.52

Crystal Color, Habit brown, prism

Crystal Dimensions 0.10 X 0.10 X 0.10 mm

Crystal System monoclinic

Lattice Type C-centered

Indexing Images 2 stills @ 0.8 minutes

Detector Position 110.00 mm

Detector Swing Angle 5.00o

Pixel Size 0.100 mm

Lattice Parameters a = 21.695(2) Å

b =  11.1778(7) Å

c =  21.600(1) Å

 = 120.957(3) o

V = 4492.0(5) Å3

Space Group C2/c (#15)

Z value 4

Dcalc 1.501 g/cm3

F000 2032.00

(MoK) 9.00 cm-1

B. Intensity Measurements

Diffractometer RAXIS-RAPID

Radiation MoK ( = 0.71069 Å)

graphite monochromated

Detector Aperture 200 mm x 200 mm

Data Images 44 exposures @ 25.0 minutes

Oscillation Range 220.0o

Detector Position 110.00 mm

Detector Swing Angle 5.00o

Pixel Size 0.100 mm

2max 55.0o

No. of Reflections Measured Total: 5415

Corrections Lorentz-polarization

Absorption

(trans. factors: 0.9475 - 1.0516)

C. Structure Solution and Refinement

Structure Solution Direct Methods (SIR92)

Refinement Full-matrix least-squares on F

Function Minimized  w (|Fo| - |Fc|)2

Least Squares Weights 1/2(Fo) = 4Fo2/2(Fo2)

p-factor 0.0500

Anomalous Dispersion All non-hydrogen atoms

No. Observations (I>3.00(I)) 3014

No. Variables 264

Reflection/Parameter Ratio 11.40

Residuals: R; Rw 0.046 ; 0.063

Goodness of Fit Indicator 1.91

Max Shift/Error in Final Cycle 0.01

Maximum peak in Final Diff. Map 2.86 e‑/Å3

Minimum peak in Final Diff. Map -0.79 e‑/Å3

Supplementary Table 1’. Atomic coordinates and Biso/Beq and occupancy

atom    x    y    z  Beq  occ

Rh(1)  0.75466(7)  0.1510(1)  0.45016(7)  2.60(2)

Cl(1)  0.4832  0.1475  0.6677  28.10(9)   1/2

Cl(2)  0.5000 -0.0251  0.7500  37.58(8)   1/2

O(1)  0.698(1) -0.093(2)  0.448(1)  6.3(5)

O(2)  0.649(1)  0.177(2)  0.2924(8)  7.1(5)

N(1)  0.8093(7)  0.304(1)  0.4521(7)  2.6(3)

N(2)  0.8376(7)  0.129(1)  0.5562(7)  2.7(3)

C(1)  0.787(1)  0.408(2)  0.4124(9)  2.8(4)

C(2)  0.848(1)  0.464(2)  0.415(1)  3.2(4)

C(3)  0.9061(9)  0.395(2)  0.456(1)  3.0(4)

C(4)  0.8832(9)  0.294(2)  0.4803(9)  2.6(3)

C(5)  0.9277(9)  0.209(2)  0.5308(9)  2.7(4)

C(6)  0.9076(9)  0.138(2)  0.5710(9)  2.9(4)

C(7)  0.955(1)  0.074(2)  0.636(1)  3.7(4)

C(8)  0.913(1)  0.031(2)  0.662(1)  3.6(4)

C(9)  0.8396(9)  0.066(2)  0.6118(9)  2.9(4)

C(10)  1.0037(9)  0.201(2)  0.547(1)  3.0(4)

C(11)  0.7820(9)  0.042(2)  0.6226(9)  2.7(4)

C(12)  1.016(1)  0.157(2)  0.495(1)  4.3(5)

C(13)  1.087(1)  0.148(3)  0.508(1)  5.6(6)

C(14)  1.143(1)  0.184(2)  0.574(2)  5.2(6)

C(15)  1.131(1)  0.228(2)  0.626(1)  4.4(5)

C(16)  1.062(1)  0.237(2)  0.613(1)  3.6(4)

C(17)  0.7970(9) -0.049(2)  0.679(1)  3.1(4)

C(18)  0.816(1) -0.166(2)  0.674(1)  4.1(5)

C(19)  0.831(1) -0.248(2)  0.729(2)  5.6(6)

C(20)  0.829(1) -0.214(3)  0.788(1)  6.1(7)

C(21)  0.811(2) -0.099(3)  0.794(1)  6.3(8)

C(22)  0.795(1) -0.017(2)  0.740(1)  4.6(5)

C(23)  0.718(1)  0.001(2)  0.449(1)  3.7(5)

C(24)  0.689(1)  0.168(2)  0.353(1)  4.2(5)

C(25)  0.4783  0.0148  0.6688  8.6(1)   1/2

H(1)  0.8451  0.5428  0.3919  2.439

H(2)  0.9568  0.4100  0.4730  2.439

H(3)  1.0118  0.0788  0.6655  2.439

Supplementary Table 1’. Atomic coordinates and Biso/Beq and occupancy (continued)

atom    x    y    z  Beq  occ

H(4)  0.9315 -0.0055  0.7089  2.439

H(5)  0.9713  0.1463  0.4480  2.439

H(6)  1.1008  0.1162  0.4664  2.439

H(7)  1.1944  0.1670  0.5860  2.439

H(8)  1.1689  0.2693  0.6707  2.439

H(9)  1.0533  0.2592  0.6563  2.439

H(10)  0.8481 -0.3432  0.7204  2.439

H(11)  0.8166 -0.1876  0.6276  2.439

H(12)  0.8448 -0.2744  0.8308  2.439

H(13)  0.8053 -0.0721  0.8407  2.439

H(14)  0.7797  0.0717  0.7487  2.439

H(15)  0.4306 -0.0101  0.6352  20.792   1/2

H(16)  0.5104 -0.0205  0.6565  20.792   1/2

Beq = 8/3 2(U11(aa*)2 + U22(bb*)2 + U33(cc*)2 + 2U12(aa*bb*)cos  + 2U13(aa*cc*)cos  + 2U23(bb*cc*)cos )

Supplementary Table 2’. Anisotropic Displacement Parameters

atom   U11   U22   U33   U12   U13   U23

Rh(1) 0.0291(6) 0.0397(7) 0.0271(6) -0.0020(8)  0.0124(5)  0.0010(8)

O(1) 0.09(1) 0.05(1) 0.09(1) -0.03(1)  0.04(1)  -0.01(1)

O(2) 0.08(1) 0.12(2) 0.034(8) -0.02(1)  0.001(8)  0.01(1)

N(1) 0.028(7) 0.042(8) 0.026(7)  0.002(6)  0.013(6)  0.005(6)

N(2) 0.030(7) 0.04(1) 0.030(7)  0.001(6)  0.014(6)  0.003(6)

C(1) 0.04(1) 0.04(1) 0.027(8)  -0.004(8)  0.017(8)  0.000(8)

C(2) 0.04(1) 0.04(1) 0.04(1)  -0.003(9)  0.022(8)  0.006(9)

C(3) 0.031(9) 0.04(1) 0.04(1)  -0.006(8)  0.018(8)  -0.002(8)

C(4) 0.033(9) 0.04(1) 0.028(8)  -0.002(8)  0.016(7)  -0.001(7)

C(5) 0.030(8) 0.04(1) 0.029(8)  -0.001(8)  0.013(7)  -0.001(8)

C(6) 0.029(8) 0.04(1) 0.030(8)  0.001(8)  0.010(7)  0.004(8)

C(7) 0.03(1) 0.06(1) 0.04(1)  0.006(9)  0.011(8)  0.014(9)

C(8) 0.032(9) 0.06(1) 0.033(9)  0.005(9)  0.009(8)  0.016(9)

C(9) 0.034(9) 0.04(1) 0.033(9)  -0.002(8)  0.017(8)  0.002(8)

C(10) 0.031(9) 0.04(1) 0.04(1)  0.001(8)  0.017(8)  0.006(8)

C(11) 0.032(9) 0.04(1) 0.029(8)  -0.002(8)  0.014(7)  0.002(8)

C(12) 0.04(1) 0.07(1) 0.05(1)  -0.00(1)  0.024(9)  -0.01(1)

C(13) 0.06(1) 0.08(2) 0.09(2)  -0.01(1)  0.05(1) -0.02(2)

C(14) 0.04(1) 0.07(2) 0.10(2)  0.01(1)  0.04(1)  -0.00(1)

C(15) 0.03(1) 0.06(1) 0.06(1)  -0.01(1)  0.01(1)  0.01(1)

C(16) 0.032(9) 0.05(1) 0.05(1)  -0.003(9)  0.016(8)  0.00(1)

C(17) 0.032(9) 0.05(1) 0.036(9)  0.002(9)  0.015(8)  0.012(9)

C(18) 0.04(1) 0.06(1) 0.06(1)  0.01(1)  0.024(9)  0.02(1)

C(19) 0.05(1) 0.06(2) 0.09(2)  0.00(1)  0.02(1)  0.03(1)

C(20) 0.06(2) 0.10(2) 0.06(2)  -0.01(2)  0.01(1)  0.04(2)

C(21) 0.08(2) 0.11(2) 0.04(1)  -0.01(2)  0.03(1)  0.02(2)

C(22) 0.06(1) 0.07(2) 0.04(1)  0.00(1)  0.03(1)  0.01(1)

C(23) 0.04(1) 0.05(1) 0.05(1)  -0.006(9)  0.019(9)  -0.01(1)

C(24) 0.05(1) 0.07(2) 0.04(1) -0.02(1)  0.018(9)  -0.00(1)

The general temperature factor expression:exp(-22(a*2U11h2 + b*2U22k2 + c*2U33l2 + 2a*b*U12hk + 2a*c*U13hl + 2b*c*U23kl))

Supplementary Table 3’. Bond Lengths(Å)

atom atom distance atom atom distance

RH1 N1 2.067(6) RH1 N2 2.074(6)

RH1 C23 1.850(9) RH1 C24 1.845(9)

CL1 C25 1.4884(1) CL2 C25 1.6272(1)

CL2 C25 1.6272(1) O1 C23 1.13(1)

O2 C24 1.14(1) N1 C1 1.375(9)

N1 C4 1.394(9) N2 C6 1.387(9)

N2 C9 1.373(9) C1 C2 1.44(1)

C1 C11 1.40(1) C2 C3 1.35(1)

C3 C4 1.44(1) C4 C5 1.39(1)

C5 C6 1.40(1) C5 C10 1.50(1)

C6 C7 1.43(1) C7 C8 1.38(1)

C8 C9 1.44(1) C9 C11 1.41(1)

C10 C12 1.39(1) C10 C16 1.39(1)

C11 C17 1.49(1) C12 C13 1.40(1)

C13 C14 1.37(1) C14 C15 1.36(1)

C15 C16 1.38(1) C17 C18 1.39(1)

C17 C22 1.40(1) C18 C19 1.40(1)

C19 C20 1.36(2) C20 C21 1.36(2)

C21 C22 1.38(1)

C2 H1 1.0 C3 H2 1.0

C7 H3 1.1 C8 H4 1.0

C12 H5 1.0 C13 H6 1.1

C14 H7 1.0 C15 H8 1.0

C16 H9 1.1 C18 H11 1.0

C19 H10 1.2 C20 H12 1.0

C21 H13 1.1 C22 H14 1.1

C25 H15 0.9 C25 H16 0.9

Supplementary Table 4’. Bond Angles(o)

atom atom atom angle atom atom atom angle

N1 RH1 N2 84.9(2) N1 RH1 C23 170.9(3)

N1 RH1 C24 92.1(3) N2 RH1 C23 91.7(3)

N2 RH1 C24 173.2(3) C23 RH1 C24 90.3(4)

C25 CL2 C25 148.152(3) RH1 N1 C1 132.2(5)

RH1 N1 C4 117.7(5) C1 N1 C4 107.0(6)

RH1 N2 C6 118.1(5) RH1 N2 C9 130.1(5)

C6 N2 C9 107.3(6) N1 C1 C2 108.8(7)

N1 C1 C11 127.7(7) C2 C1 C11 123.4(7)

C1 C2 C3 107.8(7) C2 C3 C4 107.8(7)

N1 C4 C3 108.6(6) N1 C4 C5 124.7(7)

C3 C4 C5 126.3(7) C4 C5 C6 124.2(7)

C4 C5 C10 117.3(7) C6 C5 C10 118.3(7)

N2 C6 C5 123.4(7) N2 C6 C7 109.8(7)

C5 C6 C7 126.5(7) C6 C7 C8 106.1(7)

C7 C8 C9 108.1(7) N2 C9 C8 108.7(6)

N2 C9 C11 127.7(7) C8 C9 C11 123.5(7)

C5 C10 C12 118.9(7) C5 C10 C16 122.3(7)

C12 C10 C16 118.8(7) C1 C11 C9 128.5(7)

C1 C11 C17 116.0(7) C9 C11 C17 115.4(7)

C10 C12 C13 120.3(8) C12 C13 C14 119.0(9)

C13 C14 C15 121.3(9) C14 C15 C16 120.5(9)

C10 C16 C15 120.0(8) C11 C17 C18 121.6(7)

C11 C17 C22 119.9(8) C18 C17 C22 118.5(8)

C17 C18 C19 119.8(9) C18 C19 C20 120(1)

C19 C20 C21 120(1) C20 C21 C22 120(1)

C17 C22 C21 120(1) RH1 C23 O1 176.3(9)

RH1 C24 O2 178(1) CL1 C25 CL2 107.89(1)

C1 C2 H1 122 C3 C2 H1 129

C2 C3 H2 129 C4 C3 H2 122

C6 C7 H3 126 C8 C7 H3 125

C7 C8 H4 124 C9 C8 H4 127

C10 C12 H5 111 C13 C12 H5 127

C12 C13 H6 123 C14 C13 H6 116

C13 C14 H7 118 C15 C14 H7 119

C14 C15 H8 124 C16 C15 H8 114

Supplementary Table 4’. Bond Angles(o) (continued)

atom atom atom angle atom atom atom angle

C10 C16 H9 118 C15 C16 H9 120

C17 C18 H11 116 C19 C18 H11 123

C18 C19 H10 114 C20 C19 H10 125

C19 C20 H12 119 C21 C20 H12 120

C20 C21 H13 120 C22 C21 H13 118

C17 C22 H14 123 C21 C22 H14 115

CL1 C25 H15 109 CL1 C25 H16 109

CL2 C25 H15 109 CL2 C25 H16 109

H15 C25 H16 109

Supplementary Table 5’. Torsion Angles(o)

atom atom atom atom angle atom atom atom atom angle

RH1 N1 C1 C2 -157.7(6) RH1 N1 C1 C11   25(1)

RH1 N1 C4 C3  161.2(5) RH1 N1 C4 C5  -25.9(9)

RH1 N2 C6 C5   30(1) RH1 N2 C6 C7 -155.9(6)

RH1 N2 C9 C8  153.3(6) RH1 N2 C9 C11  -29(1)

CL1 C25 CL2 C25    4.4363(4) O1 C23 RH1 N1  -18(15)

O1 C23 RH1 N2  -86(13) O1 C23 RH1 C24   87(13)

O2 C24 RH1 N1   90(34) O2 C24 RH1 N2   27(37)

O2 C24 RH1 C23  -81(34) N1 RH1 N2 C6  -49.5(6)

N1 RH1 N2 C9  157.5(7) N1 C1 C2 C3   -0.7(9)

N1 C1 C11 C9   17(1) N1 C1 C11 C17 -162.1(7)

N1 C4 C3 C2    0.9(9) N1 C4 C5 C6  -14(1)

N1 C4 C5 C10  171.4(7) N2 RH1 N1 C1 -155.6(7)

N2 RH1 N1 C4   47.2(5) N2 C6 C5 C4   12(1)

N2 C6 C5 C10 -173.6(7) N2 C6 C7 C8   -2(1)

N2 C9 C8 C7    0(1) N2 C9 C11 C1  -13(1)

N2 C9 C11 C17  168.0(8) C1 N1 RH1 C23  136(2)

C1 N1 RH1 C24   30.5(7) C1 N1 C4 C3   -1.3(8)

C1 N1 C4 C5  171.7(7) C1 C2 C3 C4   -0.1(9)

C1 C11 C9 C8 -164.6(8) C1 C11 C17 C18 -119.8(9)

C1 C11 C17 C22   62(1) C2 C1 N1 C4    1.2(8)

C2 C1 C11 C9 -159.6(8) C2 C1 C11 C17   21(1)

C2 C3 C4 C5 -171.9(8) C3 C2 C1 C11  176.6(7)

C3 C4 C5 C6  157.8(8) C3 C4 C5 C10  -17(1)

C4 N1 RH1 C23  -21(2) C4 N1 RH1 C24 -126.7(6)

C4 N1 C1 C11 -176.0(7) C4 C5 C6 C7 -161.8(8)

C4 C5 C10 C12  -69(1) C4 C5 C10 C16  110.0(9)

C5 C6 N2 C9 -171.7(8) C5 C6 C7 C8  171.8(9)

C5 C10 C12 C13 -180(1) C5 C10 C16 C15  179.8(8)

C6 N2 RH1 C23  122.1(6) C6 N2 RH1 C24   15(3)

C6 N2 C9 C8   -1.9(9) C6 N2 C9 C11  175.7(8)

C6 C5 C10 C12  115.6(9) C6 C5 C10 C16  -65(1)

C6 C7 C8 C9    1(1) C7 C6 N2 C9    2.7(9)

C7 C6 C5 C10   13(1) C7 C8 C9 C11 -177.4(8)

C8 C9 C11 C17  -15(1) C9 N2 RH1 C23  -30.9(7)

Supplementary Table 7. Torsion Angles(o) (continued)

atom atom atom atom angle atom atom atom atom angle

C9 N2 RH1 C24 -138(3) C9 C11 C17 C18  -61(1)

C9 C11 C17 C22  117.1(9) C10 C12 C13 C14   -1(2)

C10 C16 C15 C14    1(2) C11 C17 C18 C19  178.3(8)

C11 C17 C22 C21 -177.6(9) C12 C10 C16 C15   -1(1)

C12 C13 C14 C15    1(2) C13 C12 C10 C16    1(2)

C13 C14 C15 C16   -0(2) C17 C18 C19 C20   -0(2)

C17 C22 C21 C20   -1(2) C18 C17 C22 C21    0(1)

C18 C19 C20 C21   -0(2) C19 C18 C17 C22    0(1)

C19 C20 C21 C22    1(2)

Supplementary Table 6’. Least Squares Planes

Plane number 1

Atoms defining plane Distance

N1 -0.233(6)

N2 -0.169(6)

C1  0.071(7)

C2  0.366(9)

C3  0.255(8)

C4 -0.108(7)

C5 -0.169(7)

C6 -0.087(8)

C7  0.219(9)

C8  0.374(9)

C9  0.136(8)

C10 -0.212(8)

Additional Atoms Distance

RH1 -1.299

Plane number 2

Atoms defining plane Distance

RH1 -0.0030(6)

N1  0.077(6)

N2  0.049(6)

C23  0.200(9)

C24  0.15(1)

Summary

plane mean deviation 

1 0.1998 9554.3

2 0.0960 968.4

Supplementary Figure 1’. View of C49H30N4Rh2O4Cl2, *bis*-Rh(I)TPP (**4**), showing the atom labeling scheme. Thermal ellipsoids are scaled to the 50% probability level. Hydrogen atoms shown are drawn to an arbitrary scale.


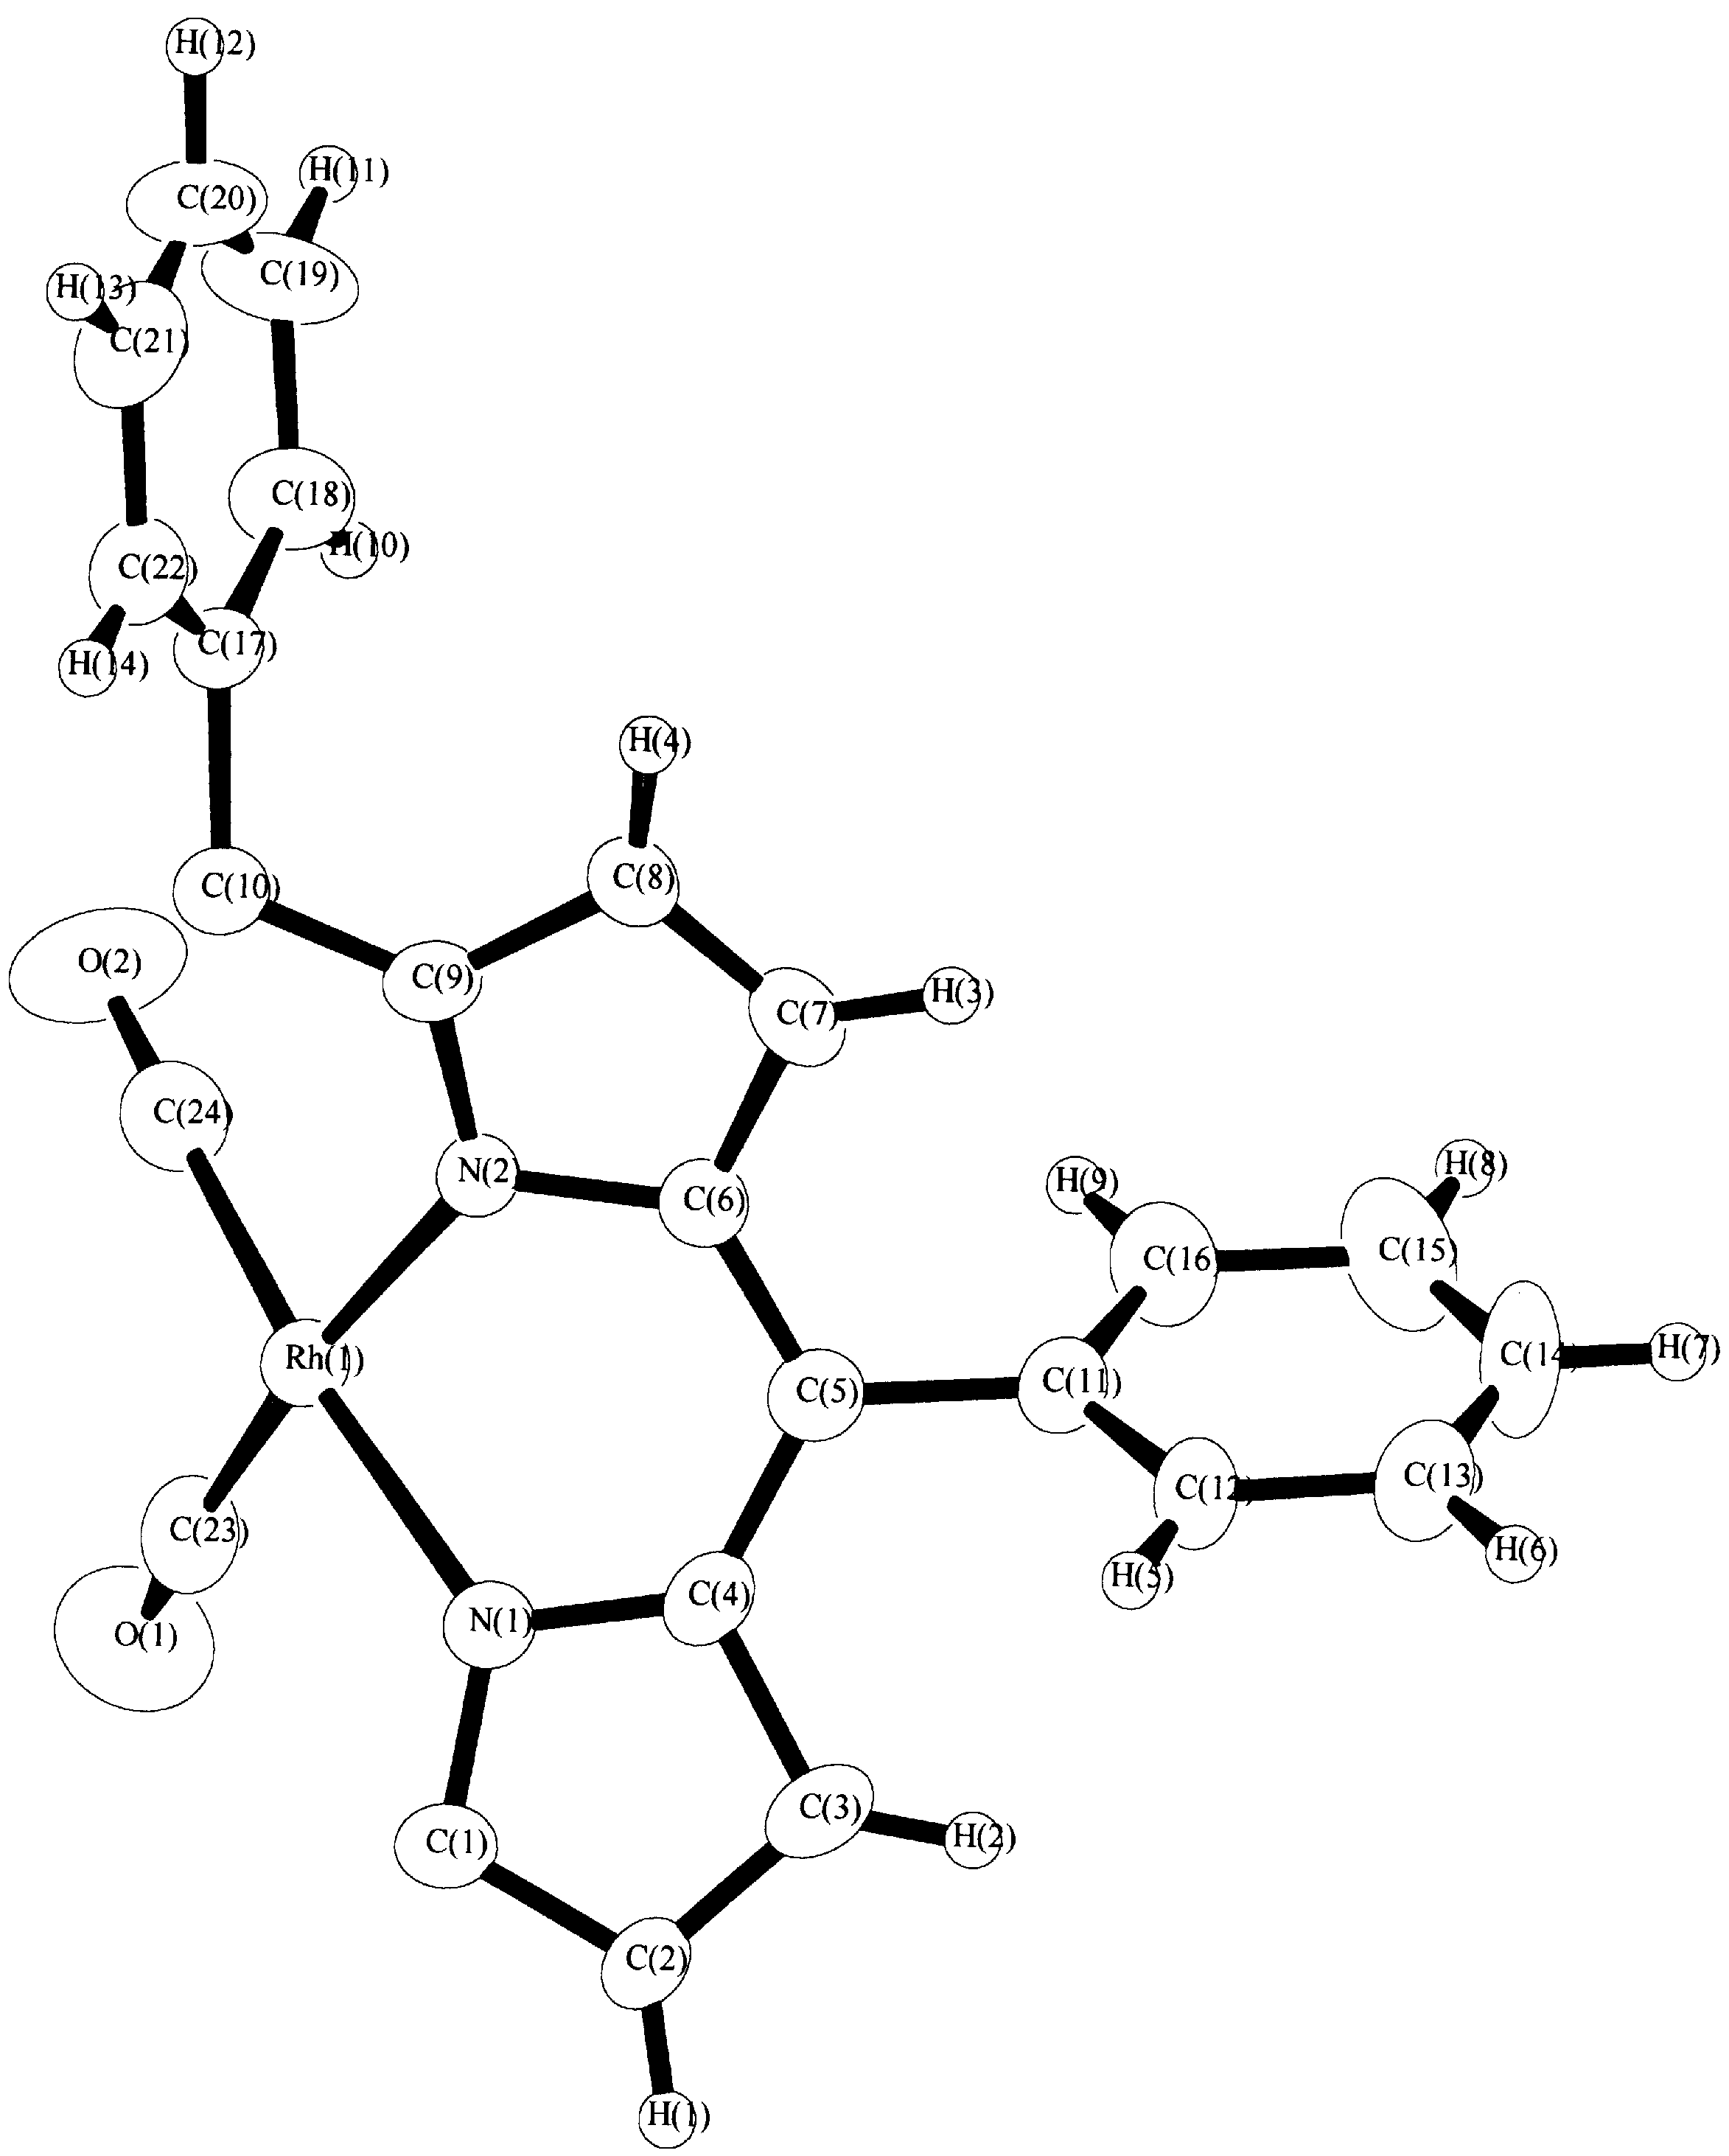


Supplementary Figure 2’. Unit cell packing diagram for *bis*-Rh(I)TPP (**4**).


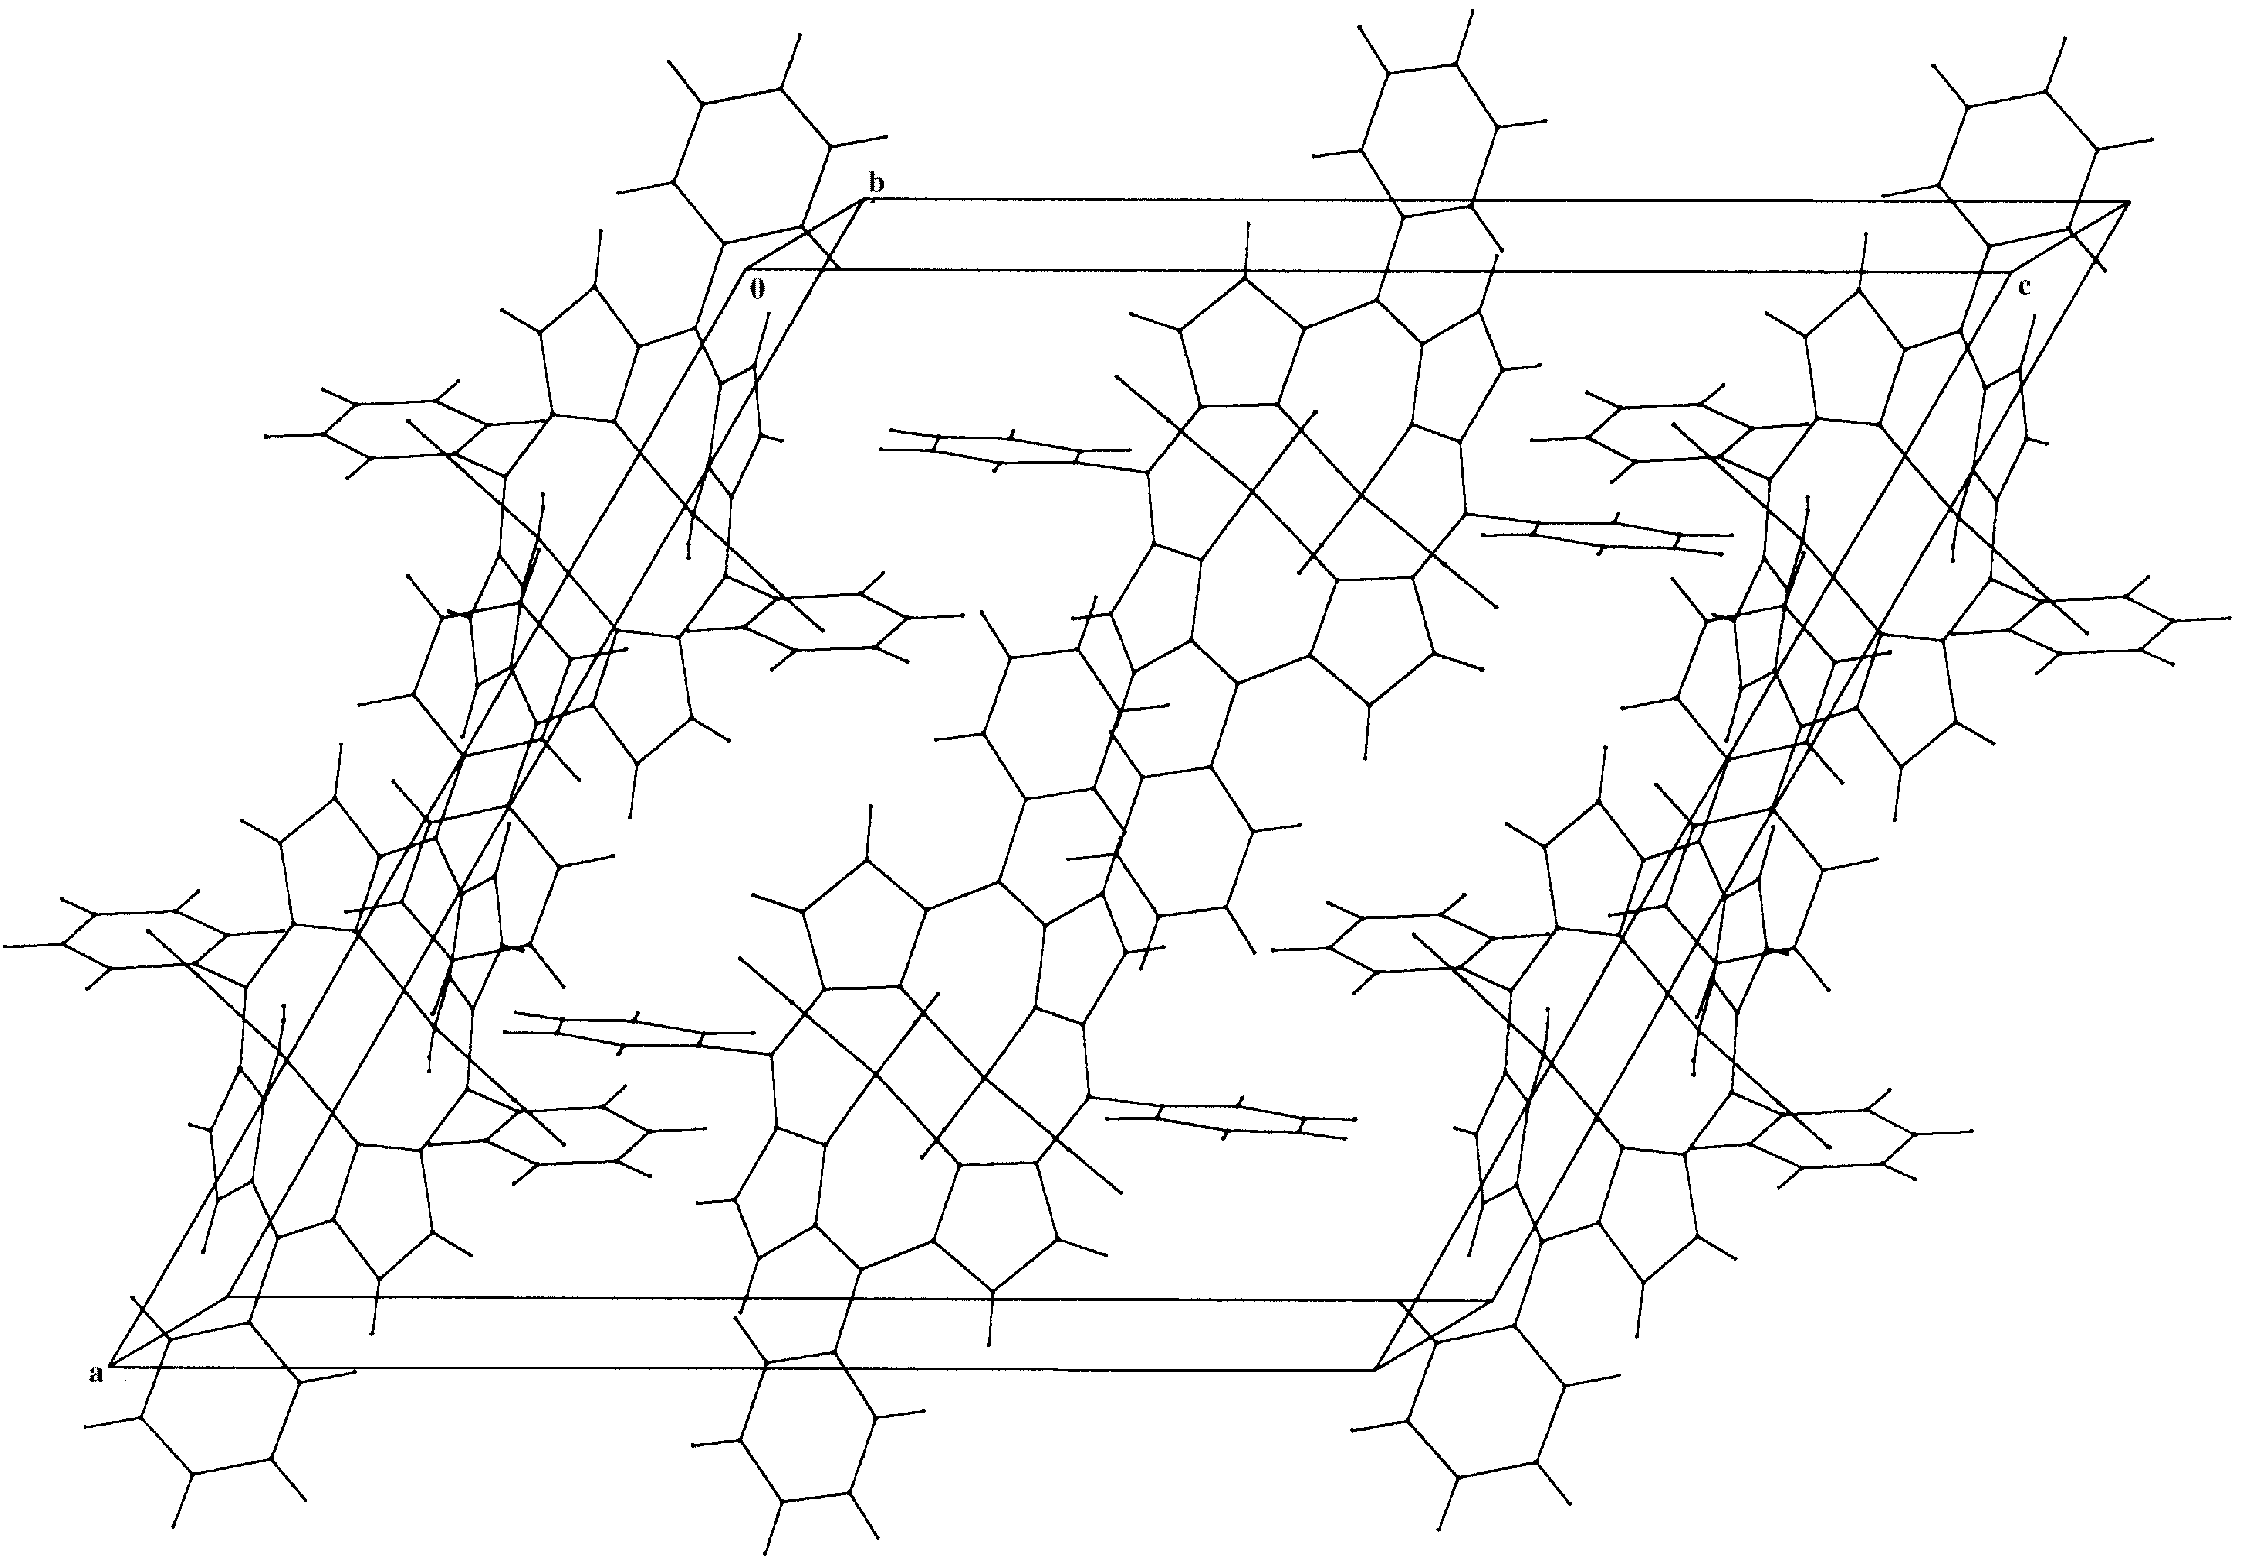

Supplement: b104004a.doc [file b104004a.doc]
